# Supplementary material for: Epidemiology of Hospitalization and Surgical Therapy in Degenerative Cervical Myelopathy: A Nationwide 20-Year Analysis
Source: Research Square preprint supplement (doi:10.21203/rs.3.rs-8206205/v1), 2025-12-02
Supplement: Supplementary file 1 [file d6af4f94fd562d3848969544.xlsx]

## Sheet: Auswahl 2024
Statistisches Bundesamt
H11 - Gesundheit
DRG-Statistik1) 2024
aus dem Krankenhaus entlassene vollstationäre Patienten (einschl. Sterbe- und Stundenfälle)
ausgewählte Hauptdiagnosen nach Geschlecht
Anzahl/Tage/durchschnittliche Verweildauer
Davon im Alter	Hauptdiagnose	männlich	weiblich	männlich	weiblich	männlich	weiblich
von … bis unter … Jahre		Anzahl		Tage		Verweildauer
insgesamt	HD M47.11	4	5	61	61	15.25	12.2
unter 1 Jahr	HD M47.11	-	-	-	-	-	-
1-5	HD M47.11	-	-	-	-	-	-
5-10	HD M47.11	-	-	-	-	-	-
10-15	HD M47.11	-	-	-	-	-	-
15-20	HD M47.11	-	-	-	-	-	-
20-25	HD M47.11	-	-	-	-	-	-
25-30	HD M47.11	-	-	-	-	-	-
30-35	HD M47.11	-	2	-	12	-	6
35-40	HD M47.11	-	-	-	-	-	-
40-45	HD M47.11	-	-	-	-	-	-
45-50	HD M47.11	-	-	-	-	-	-
50-55	HD M47.11	-	-	-	-	-	-
55-60	HD M47.11	-	-	-	-	-	-
60-65	HD M47.11	1	1	7	11	7	11
65-70	HD M47.11	1	-	8	-	8	-
70-75	HD M47.11	-	1	-	26	-	26
75-80	HD M47.11	-	-	-	-	-	-
80-85	HD M47.11	-	1	-	12	-	12
85-90	HD M47.11	1	-	36	-	36	-
90+	HD M47.11	1	-	10	-	10	-
Alter unbekannt	HD M47.11	-	-	-	-	-	-
Davon im Alter	Hauptdiagnose	männlich	weiblich	männlich	weiblich	männlich	weiblich
von … bis unter … Jahre		Anzahl		Tage		Verweildauer
insgesamt	HD M47.12	374	291	3426	2229	9.16043	7.65979
unter 1 Jahr	HD M47.12	-	-	-	-	-	-
1-5	HD M47.12	-	-	-	-	-	-
5-10	HD M47.12	-	-	-	-	-	-
10-15	HD M47.12	-	-	-	-	-	-
15-20	HD M47.12	-	1	-	5	-	5
20-25	HD M47.12	-	-	-	-	-	-
25-30	HD M47.12	2	-	8	-	4	-
30-35	HD M47.12	2	3	5	8	2.5	2.66667
35-40	HD M47.12	4	4	21	45	5.25	11.25
40-45	HD M47.12	8	8	64	26	8	3.25
45-50	HD M47.12	9	9	33	45	3.66667	5
50-55	HD M47.12	25	18	128	69	5.12	3.83333
55-60	HD M47.12	49	35	414	202	8.44898	5.77143
60-65	HD M47.12	66	46	646	348	9.78788	7.56522
65-70	HD M47.12	48	42	376	272	7.83333	6.47619
70-75	HD M47.12	61	46	516	451	8.45902	9.80435
75-80	HD M47.12	48	30	440	246	9.16667	8.2
80-85	HD M47.12	34	30	465	284	13.6765	9.46667
85-90	HD M47.12	14	15	244	196	17.4286	13.0667
90+	HD M47.12	4	4	66	32	16.5	8
Alter unbekannt	HD M47.12	-	-	-	-	-	-
Davon im Alter	Hauptdiagnose	männlich	weiblich	männlich	weiblich	männlich	weiblich
von … bis unter … Jahre		Anzahl		Tage		Verweildauer
insgesamt	HD M47.13	9	10	113	73	12.5556	7.3
unter 1 Jahr	HD M47.13	-	-	-	-	-	-
1-5	HD M47.13	-	-	-	-	-	-
5-10	HD M47.13	-	-	-	-	-	-
10-15	HD M47.13	-	-	-	-	-	-
15-20	HD M47.13	-	-	-	-	-	-
20-25	HD M47.13	-	-	-	-	-	-
25-30	HD M47.13	-	-	-	-	-	-
30-35	HD M47.13	-	-	-	-	-	-
35-40	HD M47.13	-	-	-	-	-	-
40-45	HD M47.13	-	-	-	-	-	-
45-50	HD M47.13	-	-	-	-	-	-
50-55	HD M47.13	-	-	-	-	-	-
55-60	HD M47.13	2	2	14	4	7	2
60-65	HD M47.13	2	-	21	-	10.5	-
65-70	HD M47.13	1	3	18	21	18	7
70-75	HD M47.13	1	-	34	-	34	-
75-80	HD M47.13	1	1	13	4	13	4
80-85	HD M47.13	-	1	-	6	-	6
85-90	HD M47.13	2	2	13	29	6.5	14.5
90+	HD M47.13	-	1	-	9	-	9
Alter unbekannt	HD M47.13	-	-	-	-	-	-
Davon im Alter	Hauptdiagnose	männlich	weiblich	männlich	weiblich	männlich	weiblich
von … bis unter … Jahre		Anzahl		Tage		Verweildauer
insgesamt	HD M50.0	1618	1419	10648	8842	6.58096	6.23115
unter 1 Jahr	HD M50.0	-	-	-	-	-	-
1-5	HD M50.0	-	-	-	-	-	-
5-10	HD M50.0	-	-	-	-	-	-
10-15	HD M50.0	-	-	-	-	-	-
15-20	HD M50.0	1	1	6	2	6	2
20-25	HD M50.0	5	3	28	5	5.6	1.66667
25-30	HD M50.0	9	12	23	48	2.55556	4
30-35	HD M50.0	50	39	213	154	4.26	3.94872
35-40	HD M50.0	78	65	489	275	6.26923	4.23077
40-45	HD M50.0	112	139	475	607	4.24107	4.36691
45-50	HD M50.0	130	147	590	626	4.53846	4.2585
50-55	HD M50.0	150	132	761	659	5.07333	4.99242
55-60	HD M50.0	241	195	1310	921	5.43568	4.72308
60-65	HD M50.0	253	180	1299	1051	5.13439	5.83889
65-70	HD M50.0	150	147	1049	1141	6.99333	7.7619
70-75	HD M50.0	164	132	1319	1054	8.04268	7.98485
75-80	HD M50.0	124	98	1284	837	10.3548	8.54082
80-85	HD M50.0	92	88	996	946	10.8261	10.75
85-90	HD M50.0	45	34	654	369	14.5333	10.8529
90+	HD M50.0	14	7	152	147	10.8571	21
Alter unbekannt	HD M50.0	-	-	-	-	-	-
OPS-Code2)	in Verbindung mit Hauptdiagnose	Kombinations- häufigkeit
Ergebnisse von weniger als drei Fällen werden nicht ausgewiesen
5-030.32	M471.1	4
5-839.60	M471.1	5
5-030.1	M471.2	4
5-030.30	M471.2	8
5-030.31	M471.2	28
5-030.32	M471.2	63
5-030.40	M471.2	5
5-030.41	M471.2	4
5-030.42	M471.2	6
5-030.50	M471.2	10
5-030.51	M471.2	9
5-030.52	M471.2	9
5-030.60	M471.2	16
5-030.61	M471.2	20
5-030.62	M471.2	26
5-030.70	M471.2	164
5-030.71	M471.2	179
5-030.72	M471.2	85
5-030.x	M471.2	8
5-836.30	M471.2	6
5-836.31	M471.2	6
5-836.34	M471.2	16
5-836.35	M471.2	12
5-836.37	M471.2	5
5-836.40	M471.2	3
5-836.50	M471.2	111
5-836.51	M471.2	138
5-836.55	M471.2	43
5-836.56	M471.2	7
5-837.00	M471.2	55
5-837.01	M471.2	11
5-839.0	M471.2	19
5-839.10	M471.2	7
5-839.5	M471.2	25
5-839.60	M471.2	93
5-839.61	M471.2	121
5-839.62	M471.2	55
5-839.63	M471.2	23
5-839.7	M471.2	4
5-030.62	M471.3	3
5-030.70	M471.3	4
5-839.60	M471.3	3
5-839.63	M471.3	3
5-030.1	M50.0	8
5-030.30	M50.0	60
5-030.31	M50.0	33
5-030.32	M50.0	86
5-030.40	M50.0	11
5-030.41	M50.0	7
5-030.42	M50.0	5
5-030.50	M50.0	4
5-030.51	M50.0	8
5-030.52	M50.0	11
5-030.60	M50.0	21
5-030.61	M50.0	20
5-030.62	M50.0	31
5-030.70	M50.0	1358
5-030.71	M50.0	718
5-030.72	M50.0	238
5-030.8	M50.0	6
5-030.x	M50.0	18
5-836.30	M50.0	8
5-836.31	M50.0	7
5-836.34	M50.0	15
5-836.35	M50.0	10
5-836.36	M50.0	6
5-836.37	M50.0	7
5-836.40	M50.0	6
5-836.41	M50.0	3
5-836.50	M50.0	726
5-836.51	M50.0	452
5-836.55	M50.0	104
5-836.56	M50.0	22
5-837.00	M50.0	94
5-837.01	M50.0	17
5-837.a0	M50.0	9
5-839.0	M50.0	41
5-839.10	M50.0	121
5-839.11	M50.0	35
5-839.4	M50.0	3
5-839.5	M50.0	77
5-839.60	M50.0	691
5-839.61	M50.0	472
5-839.62	M50.0	127
5-839.63	M50.0	42
5-839.7	M50.0	7
5-839.90	M50.0	3
5-839.g0	M50.0	3
5-839.g1	M50.0	4
1) Die Erhebung erstreckt sich auf alle Krankenhäuser, die nach dem DRG-Vergütungssystem abrechnen und dem
Anwendungsbereich des § 1 KHEntgG unterliegen.
2) Hierbei handelt es sich um die Anzahl der durchgeführten Operationen und Prozeduren und nicht um die Zahl der Fälle.
Pro Patient sind mehrere Operationen und Prozeduren möglich. Für die Abbildung komplexer Eingriffe und Teilmaßnahmen
ist bei Operationen in verschiedenen Bereichen eine Zuordnung von mehreren Codes (ohne Duplikate) vorgesehen.
Dementsprechend sind gegebenenfalls Mehrfachkodierungen je Behandlungsfall nachgewiesen.
Quelle: Statistisches Bundesamt, DRG-Statistik.
© Statistisches Bundesamt (Destatis), Wiesbaden, 2025
Vervielfältigung und Verbreitung, auch auszugsweise, mit Quellenangabe gestattet.

## Sheet: Auswahl 2023
Statistisches Bundesamt
H11 - Gesundheit
DRG-Statistik1) 2023
aus dem Krankenhaus entlassene vollstationäre Patienten (einschl. Sterbe- und Stundenfälle)
ausgewählte Hauptdiagnosen nach Geschlecht
Anzahl/Tage/durchschnittliche Verweildauer
Davon im Alter	Hauptdiagnose	männlich	weiblich	männlich	weiblich	männlich	weiblich
von … bis unter … Jahre		Anzahl		Tage		Verweildauer
insgesamt	HD M47.11	1	2	10	27	10	13.5
unter 1 Jahr	HD M47.11	-	-	-	-	-	-
1-5	HD M47.11	-	-	-	-	-	-
5-10	HD M47.11	-	-	-	-	-	-
10-15	HD M47.11	-	-	-	-	-	-
15-20	HD M47.11	-	-	-	-	-	-
20-25	HD M47.11	-	-	-	-	-	-
25-30	HD M47.11	-	-	-	-	-	-
30-35	HD M47.11	-	-	-	-	-	-
35-40	HD M47.11	-	-	-	-	-	-
40-45	HD M47.11	-	-	-	-	-	-
45-50	HD M47.11	1	-	10	-	10	-
50-55	HD M47.11	-	-	-	-	-	-
55-60	HD M47.11	-	-	-	-	-	-
60-65	HD M47.11	-	-	-	-	-	-
65-70	HD M47.11	-	-	-	-	-	-
70-75	HD M47.11	-	-	-	-	-	-
75-80	HD M47.11	-	1	-	12	-	12
80-85	HD M47.11	-	-	-	-	-	-
85-90	HD M47.11	-	-	-	-	-	-
90+	HD M47.11	-	1	-	15	-	15
Alter unbekannt	HD M47.11	-	-	-	-	-	-
Davon im Alter	Hauptdiagnose	männlich	weiblich	männlich	weiblich	männlich	weiblich
von … bis unter … Jahre		Anzahl		Tage		Verweildauer
insgesamt	HD M47.12	416	325	3984	2805	9.57692	8.63077
unter 1 Jahr	HD M47.12	-	-	-	-	-	-
1-5	HD M47.12	1	-	4	-	4	-
5-10	HD M47.12	-	-	-	-	-	-
10-15	HD M47.12	-	-	-	-	-	-
15-20	HD M47.12	-	-	-	-	-	-
20-25	HD M47.12	-	-	-	-	-	-
25-30	HD M47.12	-	2	-	8	-	4
30-35	HD M47.12	1	3	3	9	3	3
35-40	HD M47.12	2	4	9	24	4.5	6
40-45	HD M47.12	8	10	96	62	12	6.2
45-50	HD M47.12	16	11	105	78	6.5625	7.09091
50-55	HD M47.12	38	24	258	134	6.78947	5.58333
55-60	HD M47.12	60	34	398	184	6.63333	5.41176
60-65	HD M47.12	72	40	680	238	9.44444	5.95
65-70	HD M47.12	40	38	406	390	10.15	10.2632
70-75	HD M47.12	63	64	556	504	8.8254	7.875
75-80	HD M47.12	47	31	588	303	12.5106	9.77419
80-85	HD M47.12	47	42	628	595	13.3617	14.1667
85-90	HD M47.12	19	17	230	170	12.1053	10
90+	HD M47.12	2	5	23	106	11.5	21.2
Alter unbekannt	HD M47.12	-	-	-	-	-	-
Davon im Alter	Hauptdiagnose	männlich	weiblich	männlich	weiblich	männlich	weiblich
von … bis unter … Jahre		Anzahl		Tage		Verweildauer
insgesamt	HD M47.13	12	8	213	38	17.75	4.75
unter 1 Jahr	HD M47.13	-	-	-	-	-	-
1-5	HD M47.13	-	-	-	-	-	-
5-10	HD M47.13	-	-	-	-	-	-
10-15	HD M47.13	-	-	-	-	-	-
15-20	HD M47.13	-	-	-	-	-	-
20-25	HD M47.13	-	-	-	-	-	-
25-30	HD M47.13	-	-	-	-	-	-
30-35	HD M47.13	-	-	-	-	-	-
35-40	HD M47.13	-	-	-	-	-	-
40-45	HD M47.13	1	-	19	-	19	-
45-50	HD M47.13	1	1	4	3	4	3
50-55	HD M47.13	-	1	-	1	-	1
55-60	HD M47.13	3	3	13	21	4.33333	7
60-65	HD M47.13	-	-	-	-	-	-
65-70	HD M47.13	-	2	-	11	-	5.5
70-75	HD M47.13	3	1	65	2	21.6667	2
75-80	HD M47.13	3	-	105	-	35	-
80-85	HD M47.13	1	-	7	-	7	-
85-90	HD M47.13	-	-	-	-	-	-
90+	HD M47.13	-	-	-	-	-	-
Alter unbekannt	HD M47.13	-	-	-	-	-	-
Davon im Alter	Hauptdiagnose	männlich	weiblich	männlich	weiblich	männlich	weiblich
von … bis unter … Jahre		Anzahl		Tage		Verweildauer
insgesamt	HD M50.0	1675	1433	12086	9327	7.21552	6.50872
unter 1 Jahr	HD M50.0	-	-	-	-	-	-
1-5	HD M50.0	-	-	-	-	-	-
5-10	HD M50.0	-	-	-	-	-	-
10-15	HD M50.0	-	-	-	-	-	-
15-20	HD M50.0	-	-	-	-	-	-
20-25	HD M50.0	1	3	4	6	4	2
25-30	HD M50.0	17	11	97	88	5.70588	8
30-35	HD M50.0	56	48	304	236	5.42857	4.91667
35-40	HD M50.0	91	108	390	585	4.28571	5.41667
40-45	HD M50.0	130	148	583	664	4.48462	4.48649
45-50	HD M50.0	130	139	748	780	5.75385	5.61151
50-55	HD M50.0	147	162	671	858	4.56463	5.2963
55-60	HD M50.0	251	180	1437	910	5.7251	5.05556
60-65	HD M50.0	264	177	1858	1072	7.03788	6.0565
65-70	HD M50.0	178	127	1637	871	9.19663	6.85827
70-75	HD M50.0	162	102	1327	769	8.19136	7.53922
75-80	HD M50.0	117	99	1384	1053	11.8291	10.6364
80-85	HD M50.0	95	92	1246	1001	13.1158	10.8804
85-90	HD M50.0	34	31	380	391	11.1765	12.6129
90+	HD M50.0	2	6	20	43	10	7.16667
Alter unbekannt	HD M50.0	-	-	-	-	-	-
OPS-Code2)	in Verbindung mit Hauptdiagnose	Kombinations- häufigkeit
Ergebnisse von weniger als drei Fällen werden nicht ausgewiesen
5-030.32	M471.1	3
5-030.1	M471.2	4
5-030.8	M471.2	4
5-839.0	M471.2	24
5-839.5	M471.2	29
5-839.7	M471.2	5
5-030.30	M471.2	19
5-030.31	M471.2	32
5-030.32	M471.2	74
5-030.40	M471.2	8
5-030.41	M471.2	6
5-030.42	M471.2	5
5-030.50	M471.2	8
5-030.51	M471.2	12
5-030.52	M471.2	11
5-030.60	M471.2	27
5-030.61	M471.2	34
5-030.62	M471.2	35
5-030.70	M471.2	173
5-030.71	M471.2	164
5-030.72	M471.2	108
5-836.30	M471.2	4
5-836.31	M471.2	10
5-836.34	M471.2	14
5-836.35	M471.2	8
5-836.38	M471.2	6
5-836.40	M471.2	3
5-836.41	M471.2	3
5-836.50	M471.2	121
5-836.51	M471.2	128
5-836.55	M471.2	57
5-836.56	M471.2	9
5-837.00	M471.2	48
5-837.01	M471.2	15
5-839.10	M471.2	7
5-839.11	M471.2	7
5-839.60	M471.2	121
5-839.61	M471.2	113
5-839.62	M471.2	67
5-839.63	M471.2	29
5-030.x	M471.2	3
5-83a.02	M471.2	3
5-030.32	M471.3	6
5-030.70	M471.3	3
5-839.60	M471.3	5
5-030.1	M50.0	5
5-030.8	M50.0	11
5-839.0	M50.0	43
5-839.5	M50.0	78
5-839.7	M50.0	8
5-030.30	M50.0	52
5-030.31	M50.0	51
5-030.32	M50.0	89
5-030.40	M50.0	16
5-030.41	M50.0	6
5-030.42	M50.0	13
5-030.50	M50.0	10
5-030.51	M50.0	6
5-030.52	M50.0	7
5-030.60	M50.0	30
5-030.61	M50.0	24
5-030.62	M50.0	36
5-030.70	M50.0	1482
5-030.71	M50.0	667
5-030.72	M50.0	253
5-836.30	M50.0	10
5-836.31	M50.0	22
5-836.34	M50.0	13
5-836.35	M50.0	8
5-836.36	M50.0	11
5-836.37	M50.0	9
5-836.38	M50.0	6
5-836.40	M50.0	7
5-836.41	M50.0	5
5-836.50	M50.0	794
5-836.51	M50.0	407
5-836.55	M50.0	111
5-836.56	M50.0	29
5-837.00	M50.0	95
5-837.01	M50.0	23
5-837.02	M50.0	3
5-839.10	M50.0	124
5-839.11	M50.0	45
5-839.12	M50.0	3
5-839.60	M50.0	717
5-839.61	M50.0	414
5-839.62	M50.0	135
5-839.63	M50.0	57
5-030.x	M50.0	20
5-837.a0	M50.0	5
1) Die Erhebung erstreckt sich auf alle Krankenhäuser, die nach dem DRG-Vergütungssystem abrechnen und dem
Anwendungsbereich des § 1 KHEntgG unterliegen.
2) Hierbei handelt es sich um die Anzahl der durchgeführten Operationen und Prozeduren und nicht um die Zahl der Fälle.
Pro Patient sind mehrere Operationen und Prozeduren möglich. Für die Abbildung komplexer Eingriffe und Teilmaßnahmen
ist bei Operationen in verschiedenen Bereichen eine Zuordnung von mehreren Codes (ohne Duplikate) vorgesehen.
Dementsprechend sind gegebenenfalls Mehrfachkodierungen je Behandlungsfall nachgewiesen.
Quelle: Statistisches Bundesamt, DRG-Statistik.
© Statistisches Bundesamt (Destatis), Wiesbaden, 2025
Vervielfältigung und Verbreitung, auch auszugsweise, mit Quellenangabe gestattet.

## Sheet: Auswahl 2022
Statistisches Bundesamt
H11 - Gesundheit
DRG-Statistik1) 2022
aus dem Krankenhaus entlassene vollstationäre Patienten (einschl. Sterbe- und Stundenfälle)
ausgewählte Hauptdiagnosen nach Geschlecht
Anzahl/Tage/durchschnittliche Verweildauer
Davon im Alter	Hauptdiagnose	männlich	weiblich	männlich	weiblich	männlich	weiblich
von … bis unter … Jahre		Anzahl		Tage		Verweildauer
insgesamt	HD M47.11	4	3	44	20	11	6.66667
unter 1 Jahr	HD M47.11	-	-	-	-	-	-
1-5	HD M47.11	-	-	-	-	-	-
5-10	HD M47.11	1	-	1	-	1	-
10-15	HD M47.11	-	-	-	-	-	-
15-20	HD M47.11	-	-	-	-	-	-
20-25	HD M47.11	-	-	-	-	-	-
25-30	HD M47.11	-	-	-	-	-	-
30-35	HD M47.11	-	-	-	-	-	-
35-40	HD M47.11	-	-	-	-	-	-
40-45	HD M47.11	-	-	-	-	-	-
45-50	HD M47.11	-	1	-	7	-	7
50-55	HD M47.11	-	1	-	8	-	8
55-60	HD M47.11	1	-	7	-	7	-
60-65	HD M47.11	1	-	25	-	25	-
65-70	HD M47.11	-	-	-	-	-	-
70-75	HD M47.11	-	-	-	-	-	-
75-80	HD M47.11	1	1	11	5	11	5
80-85	HD M47.11	-	-	-	-	-	-
85-90	HD M47.11	-	-	-	-	-	-
90+	HD M47.11	-	-	-	-	-	-
Alter unbekannt	HD M47.11	-	-	-	-	-	-
Davon im Alter	Hauptdiagnose	männlich	weiblich	männlich	weiblich	männlich	weiblich
von … bis unter … Jahre		Anzahl		Tage		Verweildauer
insgesamt	HD M47.12	380	250	3309	2012	8.70789	8.048
unter 1 Jahr	HD M47.12	-	-	-	-	-	-
1-5	HD M47.12	-	-	-	-	-	-
5-10	HD M47.12	2	-	10	-	5	-
10-15	HD M47.12	-	-	-	-	-	-
15-20	HD M47.12	1	-	19	-	19	-
20-25	HD M47.12	-	-	-	-	-	-
25-30	HD M47.12	-	1	-	2	-	2
30-35	HD M47.12	3	1	5	4	1.66667	4
35-40	HD M47.12	3	4	29	23	9.66667	5.75
40-45	HD M47.12	6	9	29	31	4.83333	3.44444
45-50	HD M47.12	21	14	123	85	5.85714	6.07143
50-55	HD M47.12	33	30	167	157	5.06061	5.23333
55-60	HD M47.12	44	35	310	195	7.04545	5.57143
60-65	HD M47.12	56	21	396	141	7.07143	6.71429
65-70	HD M47.12	58	29	619	224	10.6724	7.72414
70-75	HD M47.12	43	35	400	235	9.30233	6.71429
75-80	HD M47.12	50	27	497	284	9.94	10.5185
80-85	HD M47.12	42	30	489	416	11.6429	13.8667
85-90	HD M47.12	14	11	194	153	13.8571	13.9091
90+	HD M47.12	4	3	22	62	5.5	20.6667
Alter unbekannt	HD M47.12	-	-	-	-	-	-
Davon im Alter	Hauptdiagnose	männlich	weiblich	männlich	weiblich	männlich	weiblich
von … bis unter … Jahre		Anzahl		Tage		Verweildauer
insgesamt	HD M47.13	15	6	167	81	11.1333	13.5
unter 1 Jahr	HD M47.13	-	-	-	-	-	-
1-5	HD M47.13	-	-	-	-	-	-
5-10	HD M47.13	-	-	-	-	-	-
10-15	HD M47.13	-	-	-	-	-	-
15-20	HD M47.13	-	-	-	-	-	-
20-25	HD M47.13	-	-	-	-	-	-
25-30	HD M47.13	-	-	-	-	-	-
30-35	HD M47.13	-	-	-	-	-	-
35-40	HD M47.13	-	-	-	-	-	-
40-45	HD M47.13	2	-	26	-	13	-
45-50	HD M47.13	1	-	8	-	8	-
50-55	HD M47.13	1	-	25	-	25	-
55-60	HD M47.13	4	3	29	21	7.25	7
60-65	HD M47.13	2	1	20	49	10	49
65-70	HD M47.13	1	1	24	2	24	2
70-75	HD M47.13	2	-	10	-	5	-
75-80	HD M47.13	-	-	-	-	-	-
80-85	HD M47.13	-	1	-	9	-	9
85-90	HD M47.13	2	-	25	-	12.5	-
90+	HD M47.13	-	-	-	-	-	-
Alter unbekannt	HD M47.13	-	-	-	-	-	-
Davon im Alter	Hauptdiagnose	männlich	weiblich	männlich	weiblich	männlich	weiblich
von … bis unter … Jahre		Anzahl		Tage		Verweildauer
insgesamt	HD M50.0	1530	1361	11002	8480	7.19085	6.23071
unter 1 Jahr	HD M50.0	-	-	-	-	-	-
1-5	HD M50.0	-	-	-	-	-	-
5-10	HD M50.0	-	-	-	-	-	-
10-15	HD M50.0	-	-	-	-	-	-
15-20	HD M50.0	1	1	4	4	4	4
20-25	HD M50.0	5	4	22	15	4.4	3.75
25-30	HD M50.0	8	15	231	118	28.875	7.86667
30-35	HD M50.0	51	48	241	208	4.72549	4.33333
35-40	HD M50.0	67	73	319	339	4.76119	4.64384
40-45	HD M50.0	117	106	656	464	5.60684	4.37736
45-50	HD M50.0	127	145	573	701	4.51181	4.83448
50-55	HD M50.0	189	183	965	940	5.10582	5.13661
55-60	HD M50.0	252	178	1317	928	5.22619	5.21348
60-65	HD M50.0	196	156	1250	855	6.37755	5.48077
65-70	HD M50.0	159	135	1333	986	8.38365	7.3037
70-75	HD M50.0	130	103	1268	814	9.75385	7.90291
75-80	HD M50.0	103	91	1238	908	12.0194	9.97802
80-85	HD M50.0	82	85	915	775	11.1585	9.11765
85-90	HD M50.0	37	26	595	320	16.0811	12.3077
90+	HD M50.0	6	12	75	105	12.5	8.75
Alter unbekannt	HD M50.0	-	-	-	-	-	-
OPS-Code2)	in Verbindung mit Hauptdiagnose	Kombinations- häufigkeit
Ergebnisse von weniger als drei Fällen werden nicht ausgewiesen
5-030.1	M47.12	4
5-030.30	M47.12	17
5-030.31	M47.12	17
5-030.32	M47.12	54
5-030.40	M47.12	4
5-030.41	M47.12	5
5-030.42	M47.12	6
5-030.50	M47.12	11
5-030.51	M47.12	4
5-030.52	M47.12	8
5-030.60	M47.12	22
5-030.61	M47.12	21
5-030.62	M47.12	21
5-030.70	M47.12	156
5-030.71	M47.12	117
5-030.72	M47.12	65
5-836.30	M47.12	4
5-836.31	M47.12	10
5-836.34	M47.12	10
5-836.35	M47.12	4
5-836.36	M47.12	6
5-836.38	M47.12	7
5-836.50	M47.12	107
5-836.51	M47.12	75
5-836.55	M47.12	42
5-836.56	M47.12	6
5-837.00	M47.12	30
5-837.01	M47.12	7
5-837.a0	M47.12	4
5-839.0	M47.12	21
5-839.10	M47.12	10
5-839.11	M47.12	7
5-839.5	M47.12	23
5-839.60	M47.12	104
5-839.61	M47.12	79
5-839.62	M47.12	47
5-839.63	M47.12	19
5-839.7	M47.12	3
5-030.30	M47.13	3
5-030.32	M47.13	4
5-030.70	M47.13	4
5-030.71	M47.13	3
5-836.51	M47.13	3
5-839.60	M47.13	3
5-839.61	M47.13	3
5-030.1	M50.0	5
5-030.30	M50.0	50
5-030.31	M50.0	33
5-030.32	M50.0	74
5-030.40	M50.0	9
5-030.41	M50.0	7
5-030.42	M50.0	3
5-030.50	M50.0	11
5-030.51	M50.0	7
5-030.52	M50.0	7
5-030.60	M50.0	19
5-030.61	M50.0	22
5-030.62	M50.0	35
5-030.70	M50.0	1309
5-030.71	M50.0	724
5-030.72	M50.0	219
5-030.8	M50.0	21
5-030.x	M50.0	27
5-836.30	M50.0	6
5-836.31	M50.0	8
5-836.34	M50.0	22
5-836.35	M50.0	13
5-836.36	M50.0	8
5-836.37	M50.0	5
5-836.38	M50.0	7
5-836.40	M50.0	5
5-836.44	M50.0	4
5-836.50	M50.0	709
5-836.51	M50.0	442
5-836.55	M50.0	99
5-836.56	M50.0	27
5-837.00	M50.0	90
5-837.01	M50.0	19
5-837.a0	M50.0	5
5-839.0	M50.0	45
5-839.10	M50.0	124
5-839.11	M50.0	46
5-839.5	M50.0	72
5-839.60	M50.0	633
5-839.61	M50.0	448
5-839.62	M50.0	111
5-839.63	M50.0	55
5-839.g0	M50.0	3
1) Die Erhebung erstreckt sich auf alle Krankenhäuser, die nach dem DRG-Vergütungssystem abrechnen und dem
Anwendungsbereich des § 1 KHEntgG unterliegen.
2) Hierbei handelt es sich um die Anzahl der durchgeführten Operationen und Prozeduren und nicht um die Zahl der Fälle.
Pro Patient sind mehrere Operationen und Prozeduren möglich. Für die Abbildung komplexer Eingriffe und Teilmaßnahmen
ist bei Operationen in verschiedenen Bereichen eine Zuordnung von mehreren Codes (ohne Duplikate) vorgesehen.
Dementsprechend sind gegebenenfalls Mehrfachkodierungen je Behandlungsfall nachgewiesen.
Quelle: Statistisches Bundesamt, DRG-Statistik.
© Statistisches Bundesamt (Destatis), Wiesbaden, 2025
Vervielfältigung und Verbreitung, auch auszugsweise, mit Quellenangabe gestattet.

## Sheet: Auswahl 2021
Statistisches Bundesamt
H11 - Gesundheit
DRG-Statistik1) 2021
aus dem Krankenhaus entlassene vollstationäre Patienten (einschl. Sterbe- und Stundenfälle)
ausgewählte Hauptdiagnosen nach Geschlecht
Anzahl/Tage/durchschnittliche Verweildauer
Davon im Alter	Hauptdiagnose	männlich	weiblich	männlich	weiblich	männlich	weiblich
von … bis unter … Jahre		Anzahl		Tage		Verweildauer
insgesamt	HD M47.11	3	4	66	52	22	13
unter 1 Jahr	HD M47.11	-	-	-	-	-	-
1-5	HD M47.11	-	-	-	-	-	-
5-10	HD M47.11	-	-	-	-	-	-
10-15	HD M47.11	-	-	-	-	-	-
15-20	HD M47.11	-	-	-	-	-	-
20-25	HD M47.11	1	-	1	-	1	-
25-30	HD M47.11	-	-	-	-	-	-
30-35	HD M47.11	-	-	-	-	-	-
35-40	HD M47.11	-	-	-	-	-	-
40-45	HD M47.11	-	-	-	-	-	-
45-50	HD M47.11	-	-	-	-	-	-
50-55	HD M47.11	1	1	2	11	2	11
55-60	HD M47.11	-	-	-	-	-	-
60-65	HD M47.11	-	1	-	8	-	8
65-70	HD M47.11	1	2	63	33	63	16.5
70-75	HD M47.11	-	-	-	-	-	-
75-80	HD M47.11	-	-	-	-	-	-
80-85	HD M47.11	-	-	-	-	-	-
85-90	HD M47.11	-	-	-	-	-	-
90+	HD M47.11	-	-	-	-	-	-
Alter unbekannt	HD M47.11	-	-	-	-	-	-
Davon im Alter	Hauptdiagnose	männlich	weiblich	männlich	weiblich	männlich	weiblich
von … bis unter … Jahre		Anzahl		Tage		Verweildauer
insgesamt	HD M47.12	403	314	3692	2615	9.16129	8.32803
unter 1 Jahr	HD M47.12	-	-	-	-	-	-
1-5	HD M47.12	-	-	-	-	-	-
5-10	HD M47.12	-	-	-	-	-	-
10-15	HD M47.12	-	-	-	-	-	-
15-20	HD M47.12	-	-	-	-	-	-
20-25	HD M47.12	-	-	-	-	-	-
25-30	HD M47.12	-	-	-	-	-	-
30-35	HD M47.12	-	1	-	7	-	7
35-40	HD M47.12	5	5	32	25	6.4	5
40-45	HD M47.12	14	9	102	38	7.28571	4.22222
45-50	HD M47.12	13	15	220	75	16.9231	5
50-55	HD M47.12	39	29	252	129	6.46154	4.44828
55-60	HD M47.12	51	42	396	247	7.76471	5.88095
60-65	HD M47.12	61	40	424	227	6.95082	5.675
65-70	HD M47.12	49	43	474	340	9.67347	7.90698
70-75	HD M47.12	65	44	561	423	8.63077	9.61364
75-80	HD M47.12	48	39	489	561	10.1875	14.3846
80-85	HD M47.12	42	37	609	419	14.5	11.3243
85-90	HD M47.12	14	8	106	101	7.57143	12.625
90+	HD M47.12	2	2	27	23	13.5	11.5
Alter unbekannt	HD M47.12	-	-	-	-	-	-
Davon im Alter	Hauptdiagnose	männlich	weiblich	männlich	weiblich	männlich	weiblich
von … bis unter … Jahre		Anzahl		Tage		Verweildauer
insgesamt	HD M47.13	14	8	105	46	7.5	5.75
unter 1 Jahr	HD M47.13	-	-	-	-	-	-
1-5	HD M47.13	-	-	-	-	-	-
5-10	HD M47.13	-	-	-	-	-	-
10-15	HD M47.13	-	-	-	-	-	-
15-20	HD M47.13	-	-	-	-	-	-
20-25	HD M47.13	-	-	-	-	-	-
25-30	HD M47.13	-	-	-	-	-	-
30-35	HD M47.13	-	-	-	-	-	-
35-40	HD M47.13	1	-	3	-	3	-
40-45	HD M47.13	-	-	-	-	-	-
45-50	HD M47.13	1	-	12	-	12	-
50-55	HD M47.13	1	2	4	4	4	2
55-60	HD M47.13	1	2	4	9	4	4.5
60-65	HD M47.13	2	-	11	-	5.5	-
65-70	HD M47.13	2	-	18	-	9	-
70-75	HD M47.13	1	1	14	6	14	6
75-80	HD M47.13	2	-	19	-	9.5	-
80-85	HD M47.13	1	3	3	27	3	9
85-90	HD M47.13	2	-	17	-	8.5	-
90+	HD M47.13	-	-	-	-	-	-
Alter unbekannt	HD M47.13	-	-	-	-	-	-
Davon im Alter	Hauptdiagnose	männlich	weiblich	männlich	weiblich	männlich	weiblich
von … bis unter … Jahre		Anzahl		Tage		Verweildauer
insgesamt	HD M50.0	1653	1419	11103	9009	6.71688	6.34884
unter 1 Jahr	HD M50.0	-	-	-	-	-	-
1-5	HD M50.0	-	-	-	-	-	-
5-10	HD M50.0	-	-	-	-	-	-
10-15	HD M50.0	-	-	-	-	-	-
15-20	HD M50.0	-	-	-	-	-	-
20-25	HD M50.0	3	2	9	6	3	3
25-30	HD M50.0	19	18	82	91	4.31579	5.05556
30-35	HD M50.0	49	35	199	155	4.06122	4.42857
35-40	HD M50.0	85	80	388	413	4.56471	5.1625
40-45	HD M50.0	110	156	615	752	5.59091	4.82051
45-50	HD M50.0	147	156	734	810	4.9932	5.19231
50-55	HD M50.0	207	176	1241	942	5.99517	5.35227
55-60	HD M50.0	276	208	1575	1177	5.70652	5.65865
60-65	HD M50.0	247	154	1657	858	6.7085	5.57143
65-70	HD M50.0	135	110	927	884	6.86667	8.03636
70-75	HD M50.0	141	101	1039	764	7.36879	7.56436
75-80	HD M50.0	113	94	1230	812	10.885	8.6383
80-85	HD M50.0	85	91	967	891	11.3765	9.79121
85-90	HD M50.0	31	30	355	340	11.4516	11.3333
90+	HD M50.0	5	8	85	114	17	14.25
Alter unbekannt	HD M50.0	-	-	-	-	-	-
OPS-Code2)	in Verbindung mit Hauptdiagnose	Kombinations- häufigkeit
Ergebnisse von weniger als drei Fällen werden nicht ausgewiesen
5-030.1	M47.12	5
5-030.30	M47.12	13
5-030.31	M47.12	22
5-030.32	M47.12	56
5-030.40	M47.12	3
5-030.41	M47.12	9
5-030.42	M47.12	13
5-030.50	M47.12	11
5-030.51	M47.12	11
5-030.52	M47.12	11
5-030.60	M47.12	21
5-030.61	M47.12	22
5-030.62	M47.12	35
5-030.70	M47.12	202
5-030.71	M47.12	155
5-030.72	M47.12	63
5-030.x	M47.12	6
5-836.30	M47.12	6
5-836.31	M47.12	7
5-836.34	M47.12	16
5-836.35	M47.12	11
5-836.36	M47.12	11
5-836.38	M47.12	3
5-836.50	M47.12	145
5-836.51	M47.12	102
5-836.55	M47.12	44
5-836.56	M47.12	9
5-837.00	M47.12	36
5-837.01	M47.12	12
5-839.0	M47.12	18
5-839.10	M47.12	5
5-839.11	M47.12	11
5-839.5	M47.12	26
5-839.60	M47.12	115
5-839.61	M47.12	99
5-839.62	M47.12	45
5-839.63	M47.12	26
5-839.7	M47.12	4
5-83a.02	M47.12	3
5-83a.2	M47.12	3
5-030.71	M47.13	7
5-836.51	M47.13	6
5-839.60	M47.13	3
5-030.1	M50.0	3
5-030.2	M50.0	5
5-030.30	M50.0	56
5-030.31	M50.0	39
5-030.32	M50.0	86
5-030.40	M50.0	8
5-030.41	M50.0	7
5-030.42	M50.0	12
5-030.50	M50.0	12
5-030.51	M50.0	9
5-030.52	M50.0	5
5-030.60	M50.0	18
5-030.61	M50.0	20
5-030.62	M50.0	38
5-030.70	M50.0	1372
5-030.71	M50.0	747
5-030.72	M50.0	234
5-030.8	M50.0	13
5-030.x	M50.0	27
5-836.30	M50.0	11
5-836.31	M50.0	13
5-836.34	M50.0	14
5-836.35	M50.0	10
5-836.36	M50.0	6
5-836.37	M50.0	7
5-836.38	M50.0	3
5-836.41	M50.0	3
5-836.50	M50.0	752
5-836.51	M50.0	457
5-836.55	M50.0	119
5-836.56	M50.0	25
5-836.57	M50.0	3
5-837.00	M50.0	91
5-837.01	M50.0	18
5-837.02	M50.0	3
5-837.a0	M50.0	4
5-839.0	M50.0	30
5-839.10	M50.0	149
5-839.11	M50.0	68
5-839.12	M50.0	4
5-839.4	M50.0	4
5-839.5	M50.0	65
5-839.60	M50.0	613
5-839.61	M50.0	468
5-839.62	M50.0	120
5-839.63	M50.0	57
5-839.7	M50.0	4
5-839.g0	M50.0	6
1) Die Erhebung erstreckt sich auf alle Krankenhäuser, die nach dem DRG-Vergütungssystem abrechnen und dem
Anwendungsbereich des § 1 KHEntgG unterliegen.
2) Hierbei handelt es sich um die Anzahl der durchgeführten Operationen und Prozeduren und nicht um die Zahl der Fälle.
Pro Patient sind mehrere Operationen und Prozeduren möglich. Für die Abbildung komplexer Eingriffe und Teilmaßnahmen
ist bei Operationen in verschiedenen Bereichen eine Zuordnung von mehreren Codes (ohne Duplikate) vorgesehen.
Dementsprechend sind gegebenenfalls Mehrfachkodierungen je Behandlungsfall nachgewiesen.
Quelle: Statistisches Bundesamt, DRG-Statistik.
© Statistisches Bundesamt (Destatis), Wiesbaden, 2025
Vervielfältigung und Verbreitung, auch auszugsweise, mit Quellenangabe gestattet.

## Sheet: Auswahl 2020
Statistisches Bundesamt
H11 - Gesundheit
DRG-Statistik1) 2020
aus dem Krankenhaus entlassene vollstationäre Patienten (einschl. Sterbe- und Stundenfälle)
ausgewählte Hauptdiagnosen nach Geschlecht
Anzahl/Tage/durchschnittliche Verweildauer
Davon im Alter	Hauptdiagnose	männlich	weiblich	männlich	weiblich	männlich	weiblich
von … bis unter … Jahre		Anzahl		Tage		Verweildauer
insgesamt	HD M47.11	3	8	77	105	25.6667	13.125
unter 1 Jahr	HD M47.11	-	-	-	-	-	-
1-5	HD M47.11	-	-	-	-	-	-
5-10	HD M47.11	-	-	-	-	-	-
10-15	HD M47.11	-	-	-	-	-	-
15-20	HD M47.11	-	-	-	-	-	-
20-25	HD M47.11	-	-	-	-	-	-
25-30	HD M47.11	-	-	-	-	-	-
30-35	HD M47.11	-	-	-	-	-	-
35-40	HD M47.11	-	1	-	20	-	20
40-45	HD M47.11	-	-	-	-	-	-
45-50	HD M47.11	-	-	-	-	-	-
50-55	HD M47.11	-	-	-	-	-	-
55-60	HD M47.11	-	-	-	-	-	-
60-65	HD M47.11	-	-	-	-	-	-
65-70	HD M47.11	-	-	-	-	-	-
70-75	HD M47.11	-	2	-	28	-	14
75-80	HD M47.11	-	2	-	10	-	5
80-85	HD M47.11	2	1	22	22	11	22
85-90	HD M47.11	1	2	55	25	55	12.5
90+	HD M47.11	-	-	-	-	-	-
Alter unbekannt	HD M47.11	-	-	-	-	-	-
Davon im Alter	Hauptdiagnose	männlich	weiblich	männlich	weiblich	männlich	weiblich
von … bis unter … Jahre		Anzahl		Tage		Verweildauer
insgesamt	HD M47.12	443	316	4277	2674	9.65463	8.46203
unter 1 Jahr	HD M47.12	-	-	-	-	-	-
1-5	HD M47.12	-	-	-	-	-	-
5-10	HD M47.12	-	-	-	-	-	-
10-15	HD M47.12	-	1	-	2	-	2
15-20	HD M47.12	-	-	-	-	-	-
20-25	HD M47.12	-	-	-	-	-	-
25-30	HD M47.12	1	-	6	-	6	-
30-35	HD M47.12	-	1	-	3	-	3
35-40	HD M47.12	3	11	13	88	4.33333	8
40-45	HD M47.12	15	8	122	29	8.13333	3.625
45-50	HD M47.12	24	16	133	65	5.54167	4.0625
50-55	HD M47.12	40	23	230	131	5.75	5.69565
55-60	HD M47.12	62	44	556	249	8.96774	5.65909
60-65	HD M47.12	57	37	470	267	8.24561	7.21622
65-70	HD M47.12	73	33	549	321	7.52055	9.72727
70-75	HD M47.12	42	33	429	216	10.2143	6.54545
75-80	HD M47.12	59	51	908	509	15.3898	9.98039
80-85	HD M47.12	51	32	656	381	12.8627	11.9062
85-90	HD M47.12	10	23	151	370	15.1	16.087
90+	HD M47.12	6	3	54	43	9	14.3333
Alter unbekannt	HD M47.12	-	-	-	-	-	-
Davon im Alter	Hauptdiagnose	männlich	weiblich	männlich	weiblich	männlich	weiblich
von … bis unter … Jahre		Anzahl		Tage		Verweildauer
insgesamt	HD M47.13	8	13	89	96	11.125	7.38462
unter 1 Jahr	HD M47.13	-	-	-	-	-	-
1-5	HD M47.13	-	-	-	-	-	-
5-10	HD M47.13	-	-	-	-	-	-
10-15	HD M47.13	-	-	-	-	-	-
15-20	HD M47.13	-	-	-	-	-	-
20-25	HD M47.13	-	-	-	-	-	-
25-30	HD M47.13	-	-	-	-	-	-
30-35	HD M47.13	1	-	12	-	12	-
35-40	HD M47.13	-	-	-	-	-	-
40-45	HD M47.13	-	-	-	-	-	-
45-50	HD M47.13	-	2	-	5	-	2.5
50-55	HD M47.13	1	-	16	-	16	-
55-60	HD M47.13	3	2	17	10	5.66667	5
60-65	HD M47.13	-	1	-	4	-	4
65-70	HD M47.13	-	2	-	23	-	11.5
70-75	HD M47.13	-	-	-	-	-	-
75-80	HD M47.13	1	4	2	34	2	8.5
80-85	HD M47.13	1	2	22	20	22	10
85-90	HD M47.13	1	-	20	-	20	-
90+	HD M47.13	-	-	-	-	-	-
Alter unbekannt	HD M47.13	-	-	-	-	-	-
Davon im Alter	Hauptdiagnose	männlich	weiblich	männlich	weiblich	männlich	weiblich
von … bis unter … Jahre		Anzahl		Tage		Verweildauer
insgesamt	HD M50.0	1561	1419	11431	9124	7.32287	6.42988
unter 1 Jahr	HD M50.0	-	-	-	-	-	-
1-5	HD M50.0	-	-	-	-	-	-
5-10	HD M50.0	-	-	-	-	-	-
10-15	HD M50.0	-	1	-	7	-	7
15-20	HD M50.0	-	-	-	-	-	-
20-25	HD M50.0	4	2	24	13	6	6.5
25-30	HD M50.0	13	16	57	55	4.38462	3.4375
30-35	HD M50.0	51	49	233	213	4.56863	4.34694
35-40	HD M50.0	64	95	285	465	4.45312	4.89474
40-45	HD M50.0	111	133	596	608	5.36937	4.57143
45-50	HD M50.0	138	155	794	732	5.75362	4.72258
50-55	HD M50.0	206	228	1237	1182	6.00485	5.18421
55-60	HD M50.0	249	201	1381	1064	5.54618	5.29353
60-65	HD M50.0	222	134	1647	856	7.41892	6.38806
65-70	HD M50.0	148	113	1212	809	8.18919	7.15929
70-75	HD M50.0	142	91	1454	837	10.2394	9.1978
75-80	HD M50.0	117	97	1423	1062	12.1624	10.9485
80-85	HD M50.0	74	82	838	927	11.3243	11.3049
85-90	HD M50.0	19	20	172	271	9.05263	13.55
90+	HD M50.0	3	2	78	23	26	11.5
Alter unbekannt	HD M50.0	-	-	-	-	-	-
OPS-Code2)	in Verbindung mit Hauptdiagnose	Kombinations- häufigkeit
Ergebnisse von weniger als drei Fällen werden nicht ausgewiesen
5-030.1	M47.11	3
5-030.32	M47.11	3
5-030.1	M47.12	4
5-030.30	M47.12	23
5-030.31	M47.12	25
5-030.32	M47.12	77
5-030.40	M47.12	4
5-030.41	M47.12	3
5-030.42	M47.12	8
5-030.50	M47.12	5
5-030.51	M47.12	7
5-030.52	M47.12	12
5-030.60	M47.12	21
5-030.61	M47.12	25
5-030.62	M47.12	46
5-030.70	M47.12	199
5-030.71	M47.12	162
5-030.72	M47.12	73
5-030.x	M47.12	6
5-836.30	M47.12	4
5-836.31	M47.12	8
5-836.32	M47.12	43
5-836.33	M47.12	14
5-836.40	M47.12	3
5-836.50	M47.12	136
5-836.51	M47.12	99
5-836.53	M47.12	52
5-837.00	M47.12	33
5-837.01	M47.12	14
5-837.a0	M47.12	3
5-839.0	M47.12	20
5-839.10	M47.12	11
5-839.11	M47.12	4
5-839.5	M47.12	37
5-839.60	M47.12	130
5-839.61	M47.12	107
5-839.62	M47.12	61
5-839.63	M47.12	29
5-83a.02	M47.12	4
5-030.70	M47.13	3
5-836.51	M47.13	3
5-839.60	M47.13	5
5-030.1	M50.0	6
5-030.30	M50.0	73
5-030.31	M50.0	48
5-030.32	M50.0	70
5-030.40	M50.0	10
5-030.41	M50.0	3
5-030.42	M50.0	11
5-030.50	M50.0	14
5-030.51	M50.0	5
5-030.52	M50.0	5
5-030.60	M50.0	32
5-030.61	M50.0	13
5-030.62	M50.0	30
5-030.70	M50.0	1389
5-030.71	M50.0	693
5-030.72	M50.0	227
5-030.8	M50.0	11
5-030.x	M50.0	25
5-836.30	M50.0	10
5-836.31	M50.0	11
5-836.32	M50.0	29
5-836.33	M50.0	7
5-836.40	M50.0	5
5-836.41	M50.0	3
5-836.50	M50.0	753
5-836.51	M50.0	407
5-836.53	M50.0	124
5-837.00	M50.0	85
5-837.01	M50.0	25
5-837.1	M50.0	4
5-837.2	M50.0	3
5-837.a0	M50.0	4
5-839.0	M50.0	29
5-839.10	M50.0	168
5-839.11	M50.0	53
5-839.12	M50.0	4
5-839.5	M50.0	53
5-839.60	M50.0	661
5-839.61	M50.0	388
5-839.62	M50.0	110
5-839.63	M50.0	29
1) Die Erhebung erstreckt sich auf alle Krankenhäuser, die nach dem DRG-Vergütungssystem abrechnen und dem
Anwendungsbereich des § 1 KHEntgG unterliegen.
2) Hierbei handelt es sich um die Anzahl der durchgeführten Operationen und Prozeduren und nicht um die Zahl der Fälle.
Pro Patient sind mehrere Operationen und Prozeduren möglich. Für die Abbildung komplexer Eingriffe und Teilmaßnahmen
ist bei Operationen in verschiedenen Bereichen eine Zuordnung von mehreren Codes (ohne Duplikate) vorgesehen.
Dementsprechend sind gegebenenfalls Mehrfachkodierungen je Behandlungsfall nachgewiesen.
Quelle: Statistisches Bundesamt, DRG-Statistik.
© Statistisches Bundesamt (Destatis), Wiesbaden, 2025
Vervielfältigung und Verbreitung, auch auszugsweise, mit Quellenangabe gestattet.

## Sheet: Auswahl 2019
Statistisches Bundesamt
H11 - Gesundheit
DRG-Statistik1) 2019
aus dem Krankenhaus entlassene vollstationäre Patienten (einschl. Sterbe- und Stundenfälle)
ausgewählte Hauptdiagnosen nach Geschlecht
Anzahl/Tage/durchschnittliche Verweildauer
Davon im Alter	Hauptdiagnose	männlich	weiblich	männlich	weiblich	männlich	weiblich
von … bis unter … Jahre		Anzahl		Tage		Verweildauer
insgesamt	HD M47.11	4	8	34	134	8.5	16.75
unter 1 Jahr	HD M47.11	-	-	-	-	-	-
1-5	HD M47.11	-	-	-	-	-	-
5-10	HD M47.11	-	-	-	-	-	-
10-15	HD M47.11	-	1	-	18	-	18
15-20	HD M47.11	-	-	-	-	-	-
20-25	HD M47.11	-	-	-	-	-	-
25-30	HD M47.11	-	-	-	-	-	-
30-35	HD M47.11	-	-	-	-	-	-
35-40	HD M47.11	1	-	8	-	8	-
40-45	HD M47.11	-	-	-	-	-	-
45-50	HD M47.11	-	-	-	-	-	-
50-55	HD M47.11	1	-	9	-	9	-
55-60	HD M47.11	-	1	-	20	-	20
60-65	HD M47.11	-	-	-	-	-	-
65-70	HD M47.11	1	-	9	-	9	-
70-75	HD M47.11	-	-	-	-	-	-
75-80	HD M47.11	1	4	8	66	8	16.5
80-85	HD M47.11	-	1	-	20	-	20
85-90	HD M47.11	-	1	-	10	-	10
90+	HD M47.11	-	-	-	-	-	-
Alter unbekannt	HD M47.11	-	-	-	-	-	-
Davon im Alter	Hauptdiagnose	männlich	weiblich	männlich	weiblich	männlich	weiblich
von … bis unter … Jahre		Anzahl		Tage		Verweildauer
insgesamt	HD M47.12	520	377	4518	3399	8.68846	9.01592
unter 1 Jahr	HD M47.12	1	1	6	7	6	7
1-5	HD M47.12	-	-	-	-	-	-
5-10	HD M47.12	-	-	-	-	-	-
10-15	HD M47.12	-	-	-	-	-	-
15-20	HD M47.12	-	-	-	-	-	-
20-25	HD M47.12	-	-	-	-	-	-
25-30	HD M47.12	1	-	2	-	2	-
30-35	HD M47.12	3	6	12	26	4	4.33333
35-40	HD M47.12	8	8	37	40	4.625	5
40-45	HD M47.12	11	8	64	40	5.81818	5
45-50	HD M47.12	26	27	183	129	7.03846	4.77778
50-55	HD M47.12	46	33	337	164	7.32609	4.9697
55-60	HD M47.12	73	42	467	248	6.39726	5.90476
60-65	HD M47.12	78	30	564	289	7.23077	9.63333
65-70	HD M47.12	69	63	545	533	7.89855	8.46032
70-75	HD M47.12	63	37	631	356	10.0159	9.62162
75-80	HD M47.12	70	59	692	791	9.88571	13.4068
80-85	HD M47.12	50	46	745	513	14.9	11.1522
85-90	HD M47.12	18	12	206	216	11.4444	18
90+	HD M47.12	3	5	27	47	9	9.4
Alter unbekannt	HD M47.12	-	-	-	-	-	-
Davon im Alter	Hauptdiagnose	männlich	weiblich	männlich	weiblich	männlich	weiblich
von … bis unter … Jahre		Anzahl		Tage		Verweildauer
insgesamt	HD M47.13	20	13	144	170	7.2	13.0769
unter 1 Jahr	HD M47.13	-	-	-	-	-	-
1-5	HD M47.13	-	-	-	-	-	-
5-10	HD M47.13	-	-	-	-	-	-
10-15	HD M47.13	-	-	-	-	-	-
15-20	HD M47.13	-	-	-	-	-	-
20-25	HD M47.13	-	-	-	-	-	-
25-30	HD M47.13	-	-	-	-	-	-
30-35	HD M47.13	-	-	-	-	-	-
35-40	HD M47.13	-	-	-	-	-	-
40-45	HD M47.13	1	1	3	1	3	1
45-50	HD M47.13	1	-	1	-	1	-
50-55	HD M47.13	-	1	-	2	-	2
55-60	HD M47.13	2	1	13	4	6.5	4
60-65	HD M47.13	2	1	12	5	6	5
65-70	HD M47.13	3	2	25	13	8.33333	6.5
70-75	HD M47.13	3	1	7	16	2.33333	16
75-80	HD M47.13	3	4	35	107	11.6667	26.75
80-85	HD M47.13	3	1	31	17	10.3333	17
85-90	HD M47.13	1	-	14	-	14	-
90+	HD M47.13	1	1	3	5	3	5
Alter unbekannt	HD M47.13	-	-	-	-	-	-
Davon im Alter	Hauptdiagnose	männlich	weiblich	männlich	weiblich	männlich	weiblich
von … bis unter … Jahre		Anzahl		Tage		Verweildauer
insgesamt	HD M50.0	1840	1645	13201	12138	7.17446	7.37872
unter 1 Jahr	HD M50.0	-	-	-	-	-	-
1-5	HD M50.0	-	-	-	-	-	-
5-10	HD M50.0	-	-	-	-	-	-
10-15	HD M50.0	-	-	-	-	-	-
15-20	HD M50.0	-	-	-	-	-	-
20-25	HD M50.0	3	2	15	7	5	3.5
25-30	HD M50.0	25	24	157	107	6.28	4.45833
30-35	HD M50.0	44	62	190	280	4.31818	4.51613
35-40	HD M50.0	81	108	433	576	5.34568	5.33333
40-45	HD M50.0	135	153	743	757	5.5037	4.94771
45-50	HD M50.0	172	191	996	1021	5.7907	5.34555
50-55	HD M50.0	249	230	1635	1625	6.56627	7.06522
55-60	HD M50.0	281	202	1707	1152	6.07473	5.70297
60-65	HD M50.0	243	175	1651	1585	6.79424	9.05714
65-70	HD M50.0	193	123	1443	1043	7.47668	8.47967
70-75	HD M50.0	146	119	1434	1056	9.82192	8.87395
75-80	HD M50.0	149	144	1390	1460	9.32886	10.1389
80-85	HD M50.0	91	75	1002	1017	11.011	13.56
85-90	HD M50.0	25	26	368	285	14.72	10.9615
90+	HD M50.0	3	11	37	167	12.3333	15.1818
Alter unbekannt	HD M50.0	-	-	-	-	-	-
OPS-Code2)	in Verbindung mit Hauptdiagnose	Kombinations- häufigkeit
Ergebnisse von weniger als drei Fällen werden nicht ausgewiesen
5-030.1	M47.11	3
5-030.32	M47.11	6
5-030.60	M47.11	6
5-836.32	M47.11	3
5-839.60	M47.11	3
5-030.1	M47.12	13
5-030.30	M47.12	16
5-030.31	M47.12	35
5-030.32	M47.12	82
5-030.40	M47.12	5
5-030.41	M47.12	5
5-030.42	M47.12	7
5-030.50	M47.12	13
5-030.51	M47.12	10
5-030.52	M47.12	9
5-030.60	M47.12	30
5-030.61	M47.12	35
5-030.62	M47.12	46
5-030.70	M47.12	244
5-030.71	M47.12	162
5-030.72	M47.12	106
5-030.8	M47.12	4
5-030.x	M47.12	5
5-836.30	M47.12	11
5-836.31	M47.12	10
5-836.32	M47.12	41
5-836.33	M47.12	17
5-836.50	M47.12	163
5-836.51	M47.12	147
5-836.53	M47.12	58
5-837.00	M47.12	54
5-837.01	M47.12	19
5-837.02	M47.12	3
5-839.0	M47.12	15
5-839.10	M47.12	10
5-839.5	M47.12	23
5-839.60	M47.12	128
5-839.61	M47.12	127
5-839.62	M47.12	68
5-839.63	M47.12	43
5-030.1	M50.0	4
5-030.30	M50.0	79
5-030.31	M50.0	61
5-030.32	M50.0	88
5-030.40	M50.0	7
5-030.41	M50.0	8
5-030.42	M50.0	8
5-030.50	M50.0	18
5-030.51	M50.0	10
5-030.52	M50.0	7
5-030.60	M50.0	24
5-030.61	M50.0	26
5-030.62	M50.0	39
5-030.70	M50.0	1472
5-030.71	M50.0	743
5-030.72	M50.0	283
5-030.8	M50.0	20
5-030.x	M50.0	45
5-836.30	M50.0	12
5-836.31	M50.0	8
5-836.32	M50.0	42
5-836.33	M50.0	9
5-836.40	M50.0	3
5-836.41	M50.0	4
5-836.42	M50.0	3
5-836.50	M50.0	854
5-836.51	M50.0	469
5-836.53	M50.0	152
5-837.00	M50.0	95
5-837.01	M50.0	32
5-837.2	M50.0	11
5-837.a0	M50.0	5
5-839.0	M50.0	51
5-839.10	M50.0	161
5-839.11	M50.0	38
5-839.12	M50.0	5
5-839.5	M50.0	78
5-839.60	M50.0	668
5-839.61	M50.0	424
5-839.62	M50.0	125
5-839.63	M50.0	38
5-839.8	M50.0	3
5-839.g0	M50.0	4
5-839.g1	M50.0	4
5-83a.01	M50.0	3
1) Die Erhebung erstreckt sich auf alle Krankenhäuser, die nach dem DRG-Vergütungssystem abrechnen und dem
Anwendungsbereich des § 1 KHEntgG unterliegen.
2) Hierbei handelt es sich um die Anzahl der durchgeführten Operationen und Prozeduren und nicht um die Zahl der Fälle.
Pro Patient sind mehrere Operationen und Prozeduren möglich. Für die Abbildung komplexer Eingriffe und Teilmaßnahmen
ist bei Operationen in verschiedenen Bereichen eine Zuordnung von mehreren Codes (ohne Duplikate) vorgesehen.
Dementsprechend sind gegebenenfalls Mehrfachkodierungen je Behandlungsfall nachgewiesen.
Quelle: Statistisches Bundesamt, DRG-Statistik.
© Statistisches Bundesamt (Destatis), Wiesbaden, 2025
Vervielfältigung und Verbreitung, auch auszugsweise, mit Quellenangabe gestattet.

## Sheet: Auswahl 2018
Statistisches Bundesamt
H11 - Gesundheit
DRG-Statistik1) 2018
aus dem Krankenhaus entlassene vollstationäre Patienten (einschl. Sterbe- und Stundenfälle)
ausgewählte Hauptdiagnosen nach Geschlecht
Anzahl/Tage/durchschnittliche Verweildauer
Davon im Alter	Hauptdiagnose	männlich	weiblich	männlich	weiblich	männlich	weiblich
von … bis unter … Jahre		Anzahl		Tage		Verweildauer
insgesamt	HD M47.11	6	3	97	67	16.1667	22.3333
unter 1 Jahr	HD M47.11	-	-	-	-	-	-
1-5	HD M47.11	-	-	-	-	-	-
5-10	HD M47.11	-	-	-	-	-	-
10-15	HD M47.11	-	-	-	-	-	-
15-20	HD M47.11	-	-	-	-	-	-
20-25	HD M47.11	-	-	-	-	-	-
25-30	HD M47.11	1	-	20	-	20	-
30-35	HD M47.11	-	-	-	-	-	-
35-40	HD M47.11	-	-	-	-	-	-
40-45	HD M47.11	-	-	-	-	-	-
45-50	HD M47.11	-	-	-	-	-	-
50-55	HD M47.11	-	1	-	31	-	31
55-60	HD M47.11	-	-	-	-	-	-
60-65	HD M47.11	-	-	-	-	-	-
65-70	HD M47.11	2	-	27	-	13.5	-
70-75	HD M47.11	1	-	14	-	14	-
75-80	HD M47.11	1	1	20	19	20	19
80-85	HD M47.11	1	1	16	17	16	17
85-90	HD M47.11	-	-	-	-	-	-
90+	HD M47.11	-	-	-	-	-	-
Alter unbekannt	HD M47.11	-	-	-	-	-	-
Davon im Alter	Hauptdiagnose	männlich	weiblich	männlich	weiblich	männlich	weiblich
von … bis unter … Jahre		Anzahl		Tage		Verweildauer
insgesamt	HD M47.12	512	387	5374	3911	10.4961	10.1059
unter 1 Jahr	HD M47.12	-	-	-	-	-	-
1-5	HD M47.12	-	-	-	-	-	-
5-10	HD M47.12	-	-	-	-	-	-
10-15	HD M47.12	-	1	-	1	-	1
15-20	HD M47.12	-	-	-	-	-	-
20-25	HD M47.12	-	1	-	2	-	2
25-30	HD M47.12	-	3	-	21	-	7
30-35	HD M47.12	4	5	18	16	4.5	3.2
35-40	HD M47.12	9	7	37	23	4.11111	3.28571
40-45	HD M47.12	14	14	104	80	7.42857	5.71429
45-50	HD M47.12	24	20	139	83	5.79167	4.15
50-55	HD M47.12	47	43	359	351	7.6383	8.16279
55-60	HD M47.12	67	42	532	322	7.9403	7.66667
60-65	HD M47.12	70	36	751	333	10.7286	9.25
65-70	HD M47.12	69	47	746	508	10.8116	10.8085
70-75	HD M47.12	68	45	787	359	11.5735	7.97778
75-80	HD M47.12	69	63	930	788	13.4783	12.5079
80-85	HD M47.12	43	44	580	791	13.4884	17.9773
85-90	HD M47.12	24	13	336	206	14	15.8462
90+	HD M47.12	4	3	55	27	13.75	9
Alter unbekannt	HD M47.12	-	-	-	-	-	-
Davon im Alter	Hauptdiagnose	männlich	weiblich	männlich	weiblich	männlich	weiblich
von … bis unter … Jahre		Anzahl		Tage		Verweildauer
insgesamt	HD M47.13	20	16	188	158	9.4	9.875
unter 1 Jahr	HD M47.13	-	-	-	-	-	-
1-5	HD M47.13	-	-	-	-	-	-
5-10	HD M47.13	-	-	-	-	-	-
10-15	HD M47.13	-	-	-	-	-	-
15-20	HD M47.13	-	-	-	-	-	-
20-25	HD M47.13	-	-	-	-	-	-
25-30	HD M47.13	-	-	-	-	-	-
30-35	HD M47.13	-	-	-	-	-	-
35-40	HD M47.13	-	-	-	-	-	-
40-45	HD M47.13	1	1	7	4	7	4
45-50	HD M47.13	-	3	-	12	-	4
50-55	HD M47.13	2	-	11	-	5.5	-
55-60	HD M47.13	3	1	35	2	11.6667	2
60-65	HD M47.13	4	3	33	46	8.25	15.3333
65-70	HD M47.13	4	-	45	-	11.25	-
70-75	HD M47.13	2	4	17	48	8.5	12
75-80	HD M47.13	2	-	26	-	13	-
80-85	HD M47.13	2	2	14	16	7	8
85-90	HD M47.13	-	1	-	10	-	10
90+	HD M47.13	-	1	-	20	-	20
Alter unbekannt	HD M47.13	-	-	-	-	-	-
Davon im Alter	Hauptdiagnose	männlich	weiblich	männlich	weiblich	männlich	weiblich
von … bis unter … Jahre		Anzahl		Tage		Verweildauer
insgesamt	HD M50.0	1978	1631	15227	11677	7.69818	7.15941
unter 1 Jahr	HD M50.0	-	-	-	-	-	-
1-5	HD M50.0	-	-	-	-	-	-
5-10	HD M50.0	-	-	-	-	-	-
10-15	HD M50.0	-	1	-	1	-	1
15-20	HD M50.0	-	-	-	-	-	-
20-25	HD M50.0	3	4	23	20	7.66667	5
25-30	HD M50.0	18	16	95	79	5.27778	4.9375
30-35	HD M50.0	47	43	567	215	12.0638	5
35-40	HD M50.0	85	105	454	521	5.34118	4.9619
40-45	HD M50.0	112	133	573	756	5.11607	5.68421
45-50	HD M50.0	190	194	1032	1160	5.43158	5.97938
50-55	HD M50.0	282	244	1955	1449	6.93262	5.93852
55-60	HD M50.0	304	198	1880	1274	6.18421	6.43434
60-65	HD M50.0	286	144	2222	893	7.76923	6.20139
65-70	HD M50.0	200	140	1725	1004	8.625	7.17143
70-75	HD M50.0	143	120	1313	1209	9.18182	10.075
75-80	HD M50.0	159	150	1492	1497	9.38365	9.98
80-85	HD M50.0	106	101	1295	1110	12.217	10.9901
85-90	HD M50.0	40	33	558	421	13.95	12.7576
90+	HD M50.0	3	5	43	68	14.3333	13.6
Alter unbekannt	HD M50.0	-	-	-	-	-	-
OPS-Code2)	in Verbindung mit Hauptdiagnose	Kombinations- häufigkeit
Ergebnisse von weniger als drei Fällen werden nicht ausgewiesen
5-030.1	M47.11	4
5-030.60	M47.11	3
5-030.1	M47.12	6
5-030.30	M47.12	15
5-030.31	M47.12	31
5-030.32	M47.12	77
5-030.40	M47.12	3
5-030.41	M47.12	10
5-030.42	M47.12	6
5-030.50	M47.12	11
5-030.51	M47.12	5
5-030.52	M47.12	10
5-030.60	M47.12	21
5-030.61	M47.12	29
5-030.62	M47.12	36
5-030.70	M47.12	192
5-030.71	M47.12	193
5-030.72	M47.12	101
5-030.x	M47.12	7
5-836.30	M47.12	9
5-836.31	M47.12	6
5-836.32	M47.12	30
5-836.33	M47.12	12
5-836.42	M47.12	6
5-836.50	M47.12	148
5-836.51	M47.12	160
5-836.53	M47.12	63
5-837.00	M47.12	58
5-837.01	M47.12	23
5-837.2	M47.12	4
5-837.a0	M47.12	5
5-839.0	M47.12	16
5-839.10	M47.12	4
5-839.5	M47.12	30
5-839.60	M47.12	119
5-839.61	M47.12	133
5-839.62	M47.12	60
5-839.63	M47.12	37
5-83a.02	M47.12	9
5-030.32	M47.13	8
5-030.70	M47.13	4
5-030.71	M47.13	3
5-030.72	M47.13	3
5-836.33	M47.13	4
5-836.50	M47.13	3
5-839.60	M47.13	4
5-839.61	M47.13	6
5-839.62	M47.13	3
5-030.1	M50.0	11
5-030.30	M50.0	79
5-030.31	M50.0	64
5-030.32	M50.0	91
5-030.40	M50.0	14
5-030.41	M50.0	4
5-030.42	M50.0	7
5-030.50	M50.0	11
5-030.52	M50.0	7
5-030.60	M50.0	20
5-030.61	M50.0	19
5-030.62	M50.0	30
5-030.70	M50.0	1549
5-030.71	M50.0	754
5-030.72	M50.0	287
5-030.8	M50.0	10
5-030.x	M50.0	23
5-836.30	M50.0	10
5-836.31	M50.0	12
5-836.32	M50.0	42
5-836.33	M50.0	8
5-836.40	M50.0	7
5-836.41	M50.0	4
5-836.42	M50.0	3
5-836.50	M50.0	927
5-836.51	M50.0	492
5-836.53	M50.0	183
5-837.00	M50.0	106
5-837.01	M50.0	29
5-837.02	M50.0	4
5-837.2	M50.0	9
5-837.a2	M50.0	3
5-839.0	M50.0	35
5-839.10	M50.0	167
5-839.11	M50.0	46
5-839.12	M50.0	3
5-839.5	M50.0	51
5-839.60	M50.0	644
5-839.61	M50.0	411
5-839.62	M50.0	135
5-839.63	M50.0	44
5-839.7	M50.0	3
5-839.a0	M50.0	4
5-839.g0	M50.0	3
5-839.g1	M50.0	6
1) Die Erhebung erstreckt sich auf alle Krankenhäuser, die nach dem DRG-Vergütungssystem abrechnen und dem
Anwendungsbereich des § 1 KHEntgG unterliegen.
2) Hierbei handelt es sich um die Anzahl der durchgeführten Operationen und Prozeduren und nicht um die Zahl der Fälle.
Pro Patient sind mehrere Operationen und Prozeduren möglich. Für die Abbildung komplexer Eingriffe und Teilmaßnahmen
ist bei Operationen in verschiedenen Bereichen eine Zuordnung von mehreren Codes (ohne Duplikate) vorgesehen.
Dementsprechend sind gegebenenfalls Mehrfachkodierungen je Behandlungsfall nachgewiesen.
Quelle: Statistisches Bundesamt, DRG-Statistik.
© Statistisches Bundesamt (Destatis), Wiesbaden, 2025
Vervielfältigung und Verbreitung, auch auszugsweise, mit Quellenangabe gestattet.

## Sheet: Auswahl 2017
Statistisches Bundesamt
H11 - Gesundheit
DRG-Statistik1) 2017
aus dem Krankenhaus entlassene vollstationäre Patienten (einschl. Sterbe- und Stundenfälle)
ausgewählte Hauptdiagnosen nach Geschlecht
Anzahl/Tage/durchschnittliche Verweildauer
Davon im Alter	Hauptdiagnose	männlich	weiblich	männlich	weiblich	männlich	weiblich
von … bis unter … Jahre		Anzahl		Tage		Verweildauer
insgesamt	HD M47.11	2	4	10	65	5	16.25
unter 1 Jahr	HD M47.11	-	-	-	-	-	-
1-5	HD M47.11	-	-	-	-	-	-
5-10	HD M47.11	-	-	-	-	-	-
10-15	HD M47.11	-	-	-	-	-	-
15-20	HD M47.11	-	-	-	-	-	-
20-25	HD M47.11	-	-	-	-	-	-
25-30	HD M47.11	-	-	-	-	-	-
30-35	HD M47.11	-	1	-	33	-	33
35-40	HD M47.11	-	-	-	-	-	-
40-45	HD M47.11	-	-	-	-	-	-
45-50	HD M47.11	-	-	-	-	-	-
50-55	HD M47.11	-	1	-	1	-	1
55-60	HD M47.11	-	-	-	-	-	-
60-65	HD M47.11	1	-	6	-	6	-
65-70	HD M47.11	-	-	-	-	-	-
70-75	HD M47.11	-	1	-	3	-	3
75-80	HD M47.11	-	-	-	-	-	-
80-85	HD M47.11	1	-	4	-	4	-
85-90	HD M47.11	-	-	-	-	-	-
90+	HD M47.11	-	1	-	28	-	28
Alter unbekannt	HD M47.11	-	-	-	-	-	-
Davon im Alter	Hauptdiagnose	männlich	weiblich	männlich	weiblich	männlich	weiblich
von … bis unter … Jahre		Anzahl		Tage		Verweildauer
insgesamt	HD M47.12	611	391	6196	3729	10.1408	9.53708
unter 1 Jahr	HD M47.12	-	-	-	-	-	-
1-5	HD M47.12	-	-	-	-	-	-
5-10	HD M47.12	-	-	-	-	-	-
10-15	HD M47.12	-	-	-	-	-	-
15-20	HD M47.12	1	2	17	2	17	1
20-25	HD M47.12	1	-	12	-	12	-
25-30	HD M47.12	-	2	-	8	-	4
30-35	HD M47.12	4	3	32	14	8	4.66667
35-40	HD M47.12	6	7	21	32	3.5	4.57143
40-45	HD M47.12	19	12	117	104	6.15789	8.66667
45-50	HD M47.12	36	32	257	298	7.13889	9.3125
50-55	HD M47.12	51	29	480	157	9.41176	5.41379
55-60	HD M47.12	92	41	817	277	8.88043	6.7561
60-65	HD M47.12	84	35	720	291	8.57143	8.31429
65-70	HD M47.12	89	42	1054	296	11.8427	7.04762
70-75	HD M47.12	64	52	723	452	11.2969	8.69231
75-80	HD M47.12	98	64	1000	833	10.2041	13.0156
80-85	HD M47.12	43	47	646	683	15.0233	14.5319
85-90	HD M47.12	19	16	265	187	13.9474	11.6875
90+	HD M47.12	4	7	35	95	8.75	13.5714
Alter unbekannt	HD M47.12	-	-	-	-	-	-
Davon im Alter	Hauptdiagnose	männlich	weiblich	männlich	weiblich	männlich	weiblich
von … bis unter … Jahre		Anzahl		Tage		Verweildauer
insgesamt	HD M47.13	6	13	73	62	12.1667	4.76923
unter 1 Jahr	HD M47.13	-	-	-	-	-	-
1-5	HD M47.13	-	-	-	-	-	-
5-10	HD M47.13	-	-	-	-	-	-
10-15	HD M47.13	-	-	-	-	-	-
15-20	HD M47.13	-	-	-	-	-	-
20-25	HD M47.13	-	-	-	-	-	-
25-30	HD M47.13	-	-	-	-	-	-
30-35	HD M47.13	-	-	-	-	-	-
35-40	HD M47.13	-	-	-	-	-	-
40-45	HD M47.13	1	2	2	7	2	3.5
45-50	HD M47.13	-	1	-	3	-	3
50-55	HD M47.13	-	2	-	3	-	1.5
55-60	HD M47.13	1	2	8	4	8	2
60-65	HD M47.13	2	-	12	-	6	-
65-70	HD M47.13	-	1	-	4	-	4
70-75	HD M47.13	1	2	43	13	43	6.5
75-80	HD M47.13	-	1	-	7	-	7
80-85	HD M47.13	-	1	-	15	-	15
85-90	HD M47.13	-	1	-	6	-	6
90+	HD M47.13	1	-	8	-	8	-
Alter unbekannt	HD M47.13	-	-	-	-	-	-
Davon im Alter	Hauptdiagnose	männlich	weiblich	männlich	weiblich	männlich	weiblich
von … bis unter … Jahre		Anzahl		Tage		Verweildauer
insgesamt	HD M50.0	2032	1716	15434	12147	7.59547	7.07867
unter 1 Jahr	HD M50.0	-	-	-	-	-	-
1-5	HD M50.0	-	2	-	5	-	2.5
5-10	HD M50.0	-	-	-	-	-	-
10-15	HD M50.0	-	-	-	-	-	-
15-20	HD M50.0	1	-	3	-	3	-
20-25	HD M50.0	5	2	52	4	10.4	2
25-30	HD M50.0	25	16	167	60	6.68	3.75
30-35	HD M50.0	52	52	267	251	5.13462	4.82692
35-40	HD M50.0	98	113	503	676	5.13265	5.9823
40-45	HD M50.0	122	137	679	679	5.56557	4.9562
45-50	HD M50.0	185	214	1092	1290	5.9027	6.02804
50-55	HD M50.0	278	273	1748	1597	6.28777	5.84982
55-60	HD M50.0	349	241	2311	1532	6.62178	6.35685
60-65	HD M50.0	248	160	2000	1074	8.06452	6.7125
65-70	HD M50.0	218	113	1889	893	8.66514	7.90265
70-75	HD M50.0	165	128	1470	1244	8.90909	9.71875
75-80	HD M50.0	161	154	1569	1457	9.74534	9.46104
80-85	HD M50.0	94	73	1201	872	12.7766	11.9452
85-90	HD M50.0	27	34	420	466	15.5556	13.7059
90+	HD M50.0	4	4	63	47	15.75	11.75
Alter unbekannt	HD M50.0	-	-	-	-	-	-
OPS-Code2)	in Verbindung mit Hauptdiagnose	Kombinations- häufigkeit
Ergebnisse von weniger als drei Fällen werden nicht ausgewiesen
5-030.1	M47.12	9
5-030.30	M47.12	23
5-030.31	M47.12	40
5-030.32	M47.12	100
5-030.40	M47.12	6
5-030.41	M47.12	5
5-030.42	M47.12	6
5-030.50	M47.12	6
5-030.51	M47.12	11
5-030.52	M47.12	10
5-030.60	M47.12	18
5-030.61	M47.12	46
5-030.62	M47.12	43
5-030.70	M47.12	253
5-030.71	M47.12	201
5-030.72	M47.12	102
5-030.x	M47.12	10
5-836.30	M47.12	11
5-836.31	M47.12	5
5-836.32	M47.12	51
5-836.33	M47.12	16
5-836.41	M47.12	3
5-836.50	M47.12	189
5-836.51	M47.12	166
5-836.53	M47.12	70
5-837.00	M47.12	67
5-837.01	M47.12	20
5-837.02	M47.12	3
5-839.0	M47.12	25
5-839.10	M47.12	5
5-839.11	M47.12	5
5-839.5	M47.12	33
5-839.60	M47.12	141
5-839.61	M47.12	143
5-839.62	M47.12	89
5-839.63	M47.12	31
5-836.50	M47.13	3
5-030.1	M50.0	4
5-030.30	M50.0	81
5-030.31	M50.0	66
5-030.32	M50.0	101
5-030.40	M50.0	5
5-030.41	M50.0	7
5-030.42	M50.0	9
5-030.50	M50.0	15
5-030.51	M50.0	8
5-030.52	M50.0	10
5-030.60	M50.0	23
5-030.61	M50.0	27
5-030.62	M50.0	34
5-030.70	M50.0	1508
5-030.71	M50.0	829
5-030.72	M50.0	330
5-030.8	M50.0	4
5-030.x	M50.0	39
5-836.30	M50.0	7
5-836.31	M50.0	17
5-836.32	M50.0	41
5-836.33	M50.0	12
5-836.40	M50.0	5
5-836.41	M50.0	6
5-836.42	M50.0	5
5-836.50	M50.0	996
5-836.51	M50.0	554
5-836.53	M50.0	193
5-836.x	M50.0	3
5-837.00	M50.0	111
5-837.01	M50.0	29
5-837.02	M50.0	4
5-837.1	M50.0	6
5-837.2	M50.0	12
5-837.a0	M50.0	3
5-839.0	M50.0	48
5-839.10	M50.0	175
5-839.11	M50.0	55
5-839.12	M50.0	6
5-839.4	M50.0	5
5-839.5	M50.0	67
5-839.60	M50.0	681
5-839.61	M50.0	447
5-839.62	M50.0	126
5-839.63	M50.0	36
5-839.g0	M50.0	14
5-839.g1	M50.0	7
1) Die Erhebung erstreckt sich auf alle Krankenhäuser, die nach dem DRG-Vergütungssystem abrechnen und dem
Anwendungsbereich des § 1 KHEntgG unterliegen.
2) Hierbei handelt es sich um die Anzahl der durchgeführten Operationen und Prozeduren und nicht um die Zahl der Fälle.
Pro Patient sind mehrere Operationen und Prozeduren möglich. Für die Abbildung komplexer Eingriffe und Teilmaßnahmen
ist bei Operationen in verschiedenen Bereichen eine Zuordnung von mehreren Codes (ohne Duplikate) vorgesehen.
Dementsprechend sind gegebenenfalls Mehrfachkodierungen je Behandlungsfall nachgewiesen.
Quelle: Statistisches Bundesamt, DRG-Statistik.
© Statistisches Bundesamt (Destatis), Wiesbaden, 2025
Vervielfältigung und Verbreitung, auch auszugsweise, mit Quellenangabe gestattet.

## Sheet: Auswahl 2016
Statistisches Bundesamt
H11 - Gesundheit
DRG-Statistik1) 2016
aus dem Krankenhaus entlassene vollstationäre Patienten (einschl. Sterbe- und Stundenfälle)
ausgewählte Hauptdiagnosen nach Geschlecht
Anzahl/Tage/durchschnittliche Verweildauer
Davon im Alter	Hauptdiagnose	männlich	weiblich	männlich	weiblich	männlich	weiblich
von … bis unter … Jahre		Anzahl		Tage		Verweildauer
insgesamt	HD M47.11	2	-	46	-	23	-
unter 1 Jahr	HD M47.11	-	-	-	-	-	-
1-5	HD M47.11	-	-	-	-	-	-
5-10	HD M47.11	-	-	-	-	-	-
10-15	HD M47.11	-	-	-	-	-	-
15-20	HD M47.11	-	-	-	-	-	-
20-25	HD M47.11	-	-	-	-	-	-
25-30	HD M47.11	-	-	-	-	-	-
30-35	HD M47.11	-	-	-	-	-	-
35-40	HD M47.11	-	-	-	-	-	-
40-45	HD M47.11	-	-	-	-	-	-
45-50	HD M47.11	-	-	-	-	-	-
50-55	HD M47.11	-	-	-	-	-	-
55-60	HD M47.11	-	-	-	-	-	-
60-65	HD M47.11	-	-	-	-	-	-
65-70	HD M47.11	-	-	-	-	-	-
70-75	HD M47.11	-	-	-	-	-	-
75-80	HD M47.11	-	-	-	-	-	-
80-85	HD M47.11	2	-	46	-	23	-
85-90	HD M47.11	-	-	-	-	-	-
90+	HD M47.11	-	-	-	-	-	-
Alter unbekannt	HD M47.11	-	-	-	-	-	-
Davon im Alter	Hauptdiagnose	männlich	weiblich	männlich	weiblich	männlich	weiblich
von … bis unter … Jahre		Anzahl		Tage		Verweildauer
insgesamt	HD M47.12	609	425	6007	3845	9.86371	9.04706
unter 1 Jahr	HD M47.12	-	-	-	-	-	-
1-5	HD M47.12	-	-	-	-	-	-
5-10	HD M47.12	-	-	-	-	-	-
10-15	HD M47.12	-	-	-	-	-	-
15-20	HD M47.12	-	-	-	-	-	-
20-25	HD M47.12	-	2	-	18	-	9
25-30	HD M47.12	2	1	20	2	10	2
30-35	HD M47.12	5	2	27	11	5.4	5.5
35-40	HD M47.12	7	3	36	10	5.14286	3.33333
40-45	HD M47.12	24	11	167	55	6.95833	5
45-50	HD M47.12	38	31	270	186	7.10526	6
50-55	HD M47.12	55	57	532	354	9.67273	6.21053
55-60	HD M47.12	90	45	755	278	8.38889	6.17778
60-65	HD M47.12	88	49	720	367	8.18182	7.4898
65-70	HD M47.12	80	50	686	426	8.575	8.52
70-75	HD M47.12	76	48	880	516	11.5789	10.75
75-80	HD M47.12	91	82	1121	1007	12.3187	12.2805
80-85	HD M47.12	34	29	486	444	14.2941	15.3103
85-90	HD M47.12	15	13	226	153	15.0667	11.7692
90+	HD M47.12	4	2	81	18	20.25	9
Alter unbekannt	HD M47.12	-	-	-	-	-	-
Davon im Alter	Hauptdiagnose	männlich	weiblich	männlich	weiblich	männlich	weiblich
von … bis unter … Jahre		Anzahl		Tage		Verweildauer
insgesamt	HD M47.13	29	22	302	173	10.4138	7.86364
unter 1 Jahr	HD M47.13	-	-	-	-	-	-
1-5	HD M47.13	-	-	-	-	-	-
5-10	HD M47.13	-	-	-	-	-	-
10-15	HD M47.13	-	-	-	-	-	-
15-20	HD M47.13	-	-	-	-	-	-
20-25	HD M47.13	-	-	-	-	-	-
25-30	HD M47.13	-	-	-	-	-	-
30-35	HD M47.13	2	-	10	-	5	-
35-40	HD M47.13	-	-	-	-	-	-
40-45	HD M47.13	2	1	23	9	11.5	9
45-50	HD M47.13	2	2	13	16	6.5	8
50-55	HD M47.13	1	3	3	11	3	3.66667
55-60	HD M47.13	4	1	41	9	10.25	9
60-65	HD M47.13	5	-	85	-	17	-
65-70	HD M47.13	1	4	2	15	2	3.75
70-75	HD M47.13	6	3	69	22	11.5	7.33333
75-80	HD M47.13	5	3	40	20	8	6.66667
80-85	HD M47.13	1	3	16	40	16	13.3333
85-90	HD M47.13	-	2	-	31	-	15.5
90+	HD M47.13	-	-	-	-	-	-
Alter unbekannt	HD M47.13	-	-	-	-	-	-
Davon im Alter	Hauptdiagnose	männlich	weiblich	männlich	weiblich	männlich	weiblich
von … bis unter … Jahre		Anzahl		Tage		Verweildauer
insgesamt	HD M50.0	2180	1848	16915	13589	7.75917	7.35335
unter 1 Jahr	HD M50.0	-	-	-	-	-	-
1-5	HD M50.0	-	-	-	-	-	-
5-10	HD M50.0	-	-	-	-	-	-
10-15	HD M50.0	-	-	-	-	-	-
15-20	HD M50.0	3	1	16	11	5.33333	11
20-25	HD M50.0	5	6	28	27	5.6	4.5
25-30	HD M50.0	21	21	195	115	9.28571	5.47619
30-35	HD M50.0	70	45	342	282	4.88571	6.26667
35-40	HD M50.0	106	88	598	450	5.64151	5.11364
40-45	HD M50.0	157	171	928	889	5.91083	5.19883
45-50	HD M50.0	232	270	1559	1514	6.71983	5.60741
50-55	HD M50.0	311	268	1917	1571	6.16399	5.86194
55-60	HD M50.0	335	226	2286	1540	6.82388	6.81416
60-65	HD M50.0	234	165	1969	1084	8.41453	6.5697
65-70	HD M50.0	225	139	1766	1065	7.84889	7.66187
70-75	HD M50.0	168	153	1638	1487	9.75	9.71895
75-80	HD M50.0	200	185	2229	2236	11.145	12.0865
80-85	HD M50.0	90	75	1084	896	12.0444	11.9467
85-90	HD M50.0	23	30	360	363	15.6522	12.1
90+	HD M50.0	-	5	-	59	-	11.8
Alter unbekannt	HD M50.0	-	-	-	-	-	-
OPS-Code2)	in Verbindung mit Hauptdiagnose	Kombinations- häufigkeit
Ergebnisse von weniger als drei Fällen werden nicht ausgewiesen
5-030.1	M47.12	9
5-030.30	M47.12	19
5-030.31	M47.12	25
5-030.32	M47.12	76
5-030.41	M47.12	4
5-030.42	M47.12	8
5-030.50	M47.12	10
5-030.51	M47.12	15
5-030.52	M47.12	9
5-030.60	M47.12	18
5-030.61	M47.12	37
5-030.62	M47.12	33
5-030.70	M47.12	253
5-030.71	M47.12	185
5-030.72	M47.12	119
5-030.x	M47.12	13
5-836.30	M47.12	9
5-836.31	M47.12	8
5-836.32	M47.12	41
5-836.33	M47.12	9
5-836.40	M47.12	4
5-836.42	M47.12	3
5-836.50	M47.12	211
5-836.51	M47.12	157
5-836.53	M47.12	93
5-837.00	M47.12	84
5-837.01	M47.12	27
5-837.02	M47.12	4
5-837.a0	M47.12	4
5-839.0	M47.12	18
5-839.10	M47.12	11
5-839.11	M47.12	4
5-839.4	M47.12	3
5-839.5	M47.12	34
5-839.60	M47.12	139
5-839.61	M47.12	142
5-839.62	M47.12	81
5-839.63	M47.12	39
5-839.a0	M47.12	4
5-83a.02	M47.12	3
5-030.30	M47.13	4
5-030.31	M47.13	3
5-030.61	M47.13	4
5-030.70	M47.13	9
5-030.71	M47.13	3
5-836.50	M47.13	8
5-836.51	M47.13	3
5-839.60	M47.13	6
5-839.61	M47.13	5
5-030.1	M50.0	5
5-030.2	M50.0	3
5-030.30	M50.0	81
5-030.31	M50.0	52
5-030.32	M50.0	107
5-030.40	M50.0	12
5-030.41	M50.0	7
5-030.42	M50.0	18
5-030.50	M50.0	17
5-030.51	M50.0	7
5-030.52	M50.0	10
5-030.60	M50.0	24
5-030.61	M50.0	24
5-030.62	M50.0	37
5-030.70	M50.0	1653
5-030.71	M50.0	916
5-030.72	M50.0	326
5-030.8	M50.0	7
5-030.x	M50.0	23
5-836.30	M50.0	13
5-836.31	M50.0	13
5-836.32	M50.0	55
5-836.40	M50.0	6
5-836.41	M50.0	7
5-836.42	M50.0	6
5-836.50	M50.0	1118
5-836.51	M50.0	602
5-836.53	M50.0	188
5-836.x	M50.0	3
5-836.y	M50.0	3
5-837.00	M50.0	118
5-837.01	M50.0	29
5-837.02	M50.0	6
5-837.1	M50.0	6
5-837.2	M50.0	10
5-837.a0	M50.0	12
5-837.a1	M50.0	3
5-837.x	M50.0	3
5-839.0	M50.0	48
5-839.10	M50.0	177
5-839.11	M50.0	65
5-839.12	M50.0	4
5-839.4	M50.0	6
5-839.5	M50.0	65
5-839.60	M50.0	699
5-839.61	M50.0	453
5-839.62	M50.0	155
5-839.63	M50.0	52
5-839.g0	M50.0	23
5-839.g1	M50.0	7
5-839.g2	M50.0	3
1) Die Erhebung erstreckt sich auf alle Krankenhäuser, die nach dem DRG-Vergütungssystem abrechnen und dem
Anwendungsbereich des § 1 KHEntgG unterliegen.
2) Hierbei handelt es sich um die Anzahl der durchgeführten Operationen und Prozeduren und nicht um die Zahl der Fälle.
Pro Patient sind mehrere Operationen und Prozeduren möglich. Für die Abbildung komplexer Eingriffe und Teilmaßnahmen
ist bei Operationen in verschiedenen Bereichen eine Zuordnung von mehreren Codes (ohne Duplikate) vorgesehen.
Dementsprechend sind gegebenenfalls Mehrfachkodierungen je Behandlungsfall nachgewiesen.
Quelle: Statistisches Bundesamt, DRG-Statistik.
© Statistisches Bundesamt (Destatis), Wiesbaden, 2025
Vervielfältigung und Verbreitung, auch auszugsweise, mit Quellenangabe gestattet.

## Sheet: Auswahl 2015
Statistisches Bundesamt
H11 - Gesundheit
DRG-Statistik1) 2015
aus dem Krankenhaus entlassene vollstationäre Patienten (einschl. Sterbe- und Stundenfälle)
ausgewählte Hauptdiagnosen nach Geschlecht
Anzahl/Tage/durchschnittliche Verweildauer
Davon im Alter	Hauptdiagnose	männlich	weiblich	männlich	weiblich	männlich	weiblich
von … bis unter … Jahre		Anzahl		Tage		Verweildauer
insgesamt	HD M47.11	9	6	133	61	14.7778	10.1667
unter 1 Jahr	HD M47.11	-	-	-	-	-	-
1-5	HD M47.11	-	1	-	5	-	5
5-10	HD M47.11	-	-	-	-	-	-
10-15	HD M47.11	-	-	-	-	-	-
15-20	HD M47.11	-	-	-	-	-	-
20-25	HD M47.11	-	-	-	-	-	-
25-30	HD M47.11	-	-	-	-	-	-
30-35	HD M47.11	-	-	-	-	-	-
35-40	HD M47.11	-	-	-	-	-	-
40-45	HD M47.11	-	-	-	-	-	-
45-50	HD M47.11	1	-	12	-	12	-
50-55	HD M47.11	-	1	-	29	-	29
55-60	HD M47.11	-	-	-	-	-	-
60-65	HD M47.11	1	1	5	7	5	7
65-70	HD M47.11	3	-	44	-	14.6667	-
70-75	HD M47.11	-	1	-	11	-	11
75-80	HD M47.11	3	-	59	-	19.6667	-
80-85	HD M47.11	-	1	-	4	-	4
85-90	HD M47.11	1	-	13	-	13	-
90+	HD M47.11	-	1	-	5	-	5
Alter unbekannt	HD M47.11	-	-	-	-	-	-
Davon im Alter	Hauptdiagnose	männlich	weiblich	männlich	weiblich	männlich	weiblich
von … bis unter … Jahre		Anzahl		Tage		Verweildauer
insgesamt	HD M47.12	638	429	6846	3979	10.7304	9.27506
unter 1 Jahr	HD M47.12	-	-	-	-	-	-
1-5	HD M47.12	-	-	-	-	-	-
5-10	HD M47.12	-	-	-	-	-	-
10-15	HD M47.12	-	-	-	-	-	-
15-20	HD M47.12	-	-	-	-	-	-
20-25	HD M47.12	1	-	3	-	3	-
25-30	HD M47.12	4	-	36	-	9	-
30-35	HD M47.12	2	4	21	19	10.5	4.75
35-40	HD M47.12	11	8	76	46	6.90909	5.75
40-45	HD M47.12	17	11	121	76	7.11765	6.90909
45-50	HD M47.12	41	35	229	207	5.58537	5.91429
50-55	HD M47.12	65	45	513	337	7.89231	7.48889
55-60	HD M47.12	98	52	838	383	8.55102	7.36538
60-65	HD M47.12	78	51	716	394	9.17949	7.72549
65-70	HD M47.12	68	39	775	355	11.3971	9.10256
70-75	HD M47.12	90	55	1017	571	11.3	10.3818
75-80	HD M47.12	102	71	1541	770	15.1078	10.8451
80-85	HD M47.12	43	33	639	489	14.8605	14.8182
85-90	HD M47.12	14	23	241	324	17.2143	14.087
90+	HD M47.12	4	2	80	8	20	4
Alter unbekannt	HD M47.12	-	-	-	-	-	-
Davon im Alter	Hauptdiagnose	männlich	weiblich	männlich	weiblich	männlich	weiblich
von … bis unter … Jahre		Anzahl		Tage		Verweildauer
insgesamt	HD M47.13	25	18	229	172	9.16	9.55556
unter 1 Jahr	HD M47.13	-	-	-	-	-	-
1-5	HD M47.13	-	-	-	-	-	-
5-10	HD M47.13	-	-	-	-	-	-
10-15	HD M47.13	-	-	-	-	-	-
15-20	HD M47.13	-	-	-	-	-	-
20-25	HD M47.13	-	-	-	-	-	-
25-30	HD M47.13	-	-	-	-	-	-
30-35	HD M47.13	-	-	-	-	-	-
35-40	HD M47.13	1	-	14	-	14	-
40-45	HD M47.13	1	-	17	-	17	-
45-50	HD M47.13	3	1	10	6	3.33333	6
50-55	HD M47.13	1	3	3	31	3	10.3333
55-60	HD M47.13	3	2	69	15	23	7.5
60-65	HD M47.13	5	1	40	8	8	8
65-70	HD M47.13	3	2	22	21	7.33333	10.5
70-75	HD M47.13	1	3	15	31	15	10.3333
75-80	HD M47.13	4	4	28	36	7	9
80-85	HD M47.13	2	1	8	11	4	11
85-90	HD M47.13	1	1	3	13	3	13
90+	HD M47.13	-	-	-	-	-	-
Alter unbekannt	HD M47.13	-	-	-	-	-	-
Davon im Alter	Hauptdiagnose	männlich	weiblich	männlich	weiblich	männlich	weiblich
von … bis unter … Jahre		Anzahl		Tage		Verweildauer
insgesamt	HD M50.0	2263	1813	18076	13788	7.98763	7.60507
unter 1 Jahr	HD M50.0	-	-	-	-	-	-
1-5	HD M50.0	-	-	-	-	-	-
5-10	HD M50.0	-	-	-	-	-	-
10-15	HD M50.0	-	-	-	-	-	-
15-20	HD M50.0	-	-	-	-	-	-
20-25	HD M50.0	7	5	68	24	9.71429	4.8
25-30	HD M50.0	14	21	64	103	4.57143	4.90476
30-35	HD M50.0	38	42	178	219	4.68421	5.21429
35-40	HD M50.0	113	101	665	552	5.88496	5.46535
40-45	HD M50.0	146	154	929	799	6.36301	5.18831
45-50	HD M50.0	251	270	1471	1540	5.86056	5.7037
50-55	HD M50.0	304	266	1889	1555	6.21382	5.84586
55-60	HD M50.0	324	229	2418	1564	7.46296	6.82969
60-65	HD M50.0	322	169	2896	1083	8.99379	6.40828
65-70	HD M50.0	213	109	1807	1392	8.48357	12.7706
70-75	HD M50.0	208	147	2049	1424	9.85096	9.68707
75-80	HD M50.0	211	180	2353	2013	11.1517	11.1833
80-85	HD M50.0	86	72	1010	894	11.7442	12.4167
85-90	HD M50.0	22	39	230	555	10.4545	14.2308
90+	HD M50.0	4	9	49	71	12.25	7.88889
Alter unbekannt	HD M50.0	-	-	-	-	-	-
OPS-Code2)	in Verbindung mit Hauptdiagnose	Kombinations- häufigkeit
Ergebnisse von weniger als drei Fällen werden nicht ausgewiesen
5-030.1	M47.11	3
5-839.61	M47.11	6
5-030.1	M47.12	5
5-030.30	M47.12	18
5-030.31	M47.12	25
5-030.32	M47.12	88
5-030.40	M47.12	6
5-030.41	M47.12	7
5-030.42	M47.12	13
5-030.50	M47.12	9
5-030.51	M47.12	13
5-030.52	M47.12	14
5-030.60	M47.12	22
5-030.61	M47.12	36
5-030.62	M47.12	55
5-030.70	M47.12	238
5-030.71	M47.12	194
5-030.72	M47.12	128
5-030.x	M47.12	11
5-836.30	M47.12	12
5-836.31	M47.12	14
5-836.32	M47.12	65
5-836.33	M47.12	11
5-836.50	M47.12	216
5-836.51	M47.12	173
5-836.53	M47.12	84
5-837.00	M47.12	93
5-837.01	M47.12	22
5-837.02	M47.12	4
5-837.2	M47.12	5
5-837.a0	M47.12	3
5-839.0	M47.12	23
5-839.10	M47.12	8
5-839.11	M47.12	6
5-839.5	M47.12	39
5-839.60	M47.12	109
5-839.61	M47.12	153
5-839.62	M47.12	93
5-839.63	M47.12	49
5-030.30	M47.13	3
5-030.32	M47.13	5
5-030.70	M47.13	7
5-839.60	M47.13	6
5-030.1	M50.0	11
5-030.30	M50.0	66
5-030.31	M50.0	45
5-030.32	M50.0	121
5-030.40	M50.0	10
5-030.41	M50.0	14
5-030.42	M50.0	18
5-030.50	M50.0	13
5-030.51	M50.0	9
5-030.52	M50.0	5
5-030.60	M50.0	31
5-030.61	M50.0	25
5-030.62	M50.0	52
5-030.70	M50.0	1616
5-030.71	M50.0	889
5-030.72	M50.0	311
5-030.8	M50.0	5
5-030.x	M50.0	32
5-836.30	M50.0	12
5-836.31	M50.0	22
5-836.32	M50.0	79
5-836.33	M50.0	15
5-836.40	M50.0	24
5-836.41	M50.0	11
5-836.42	M50.0	3
5-836.50	M50.0	1175
5-836.51	M50.0	631
5-836.53	M50.0	180
5-836.x	M50.0	6
5-837.00	M50.0	110
5-837.01	M50.0	28
5-837.02	M50.0	6
5-837.1	M50.0	7
5-837.2	M50.0	4
5-837.4	M50.0	7
5-837.x	M50.0	4
5-839.0	M50.0	56
5-839.10	M50.0	205
5-839.11	M50.0	63
5-839.12	M50.0	6
5-839.4	M50.0	5
5-839.5	M50.0	72
5-839.60	M50.0	718
5-839.61	M50.0	467
5-839.62	M50.0	122
5-839.63	M50.0	47
5-839.g0	M50.0	39
5-839.g1	M50.0	16
5-83a.x	M50.0	4
1) Die Erhebung erstreckt sich auf alle Krankenhäuser, die nach dem DRG-Vergütungssystem abrechnen und dem
Anwendungsbereich des § 1 KHEntgG unterliegen.
2) Hierbei handelt es sich um die Anzahl der durchgeführten Operationen und Prozeduren und nicht um die Zahl der Fälle.
Pro Patient sind mehrere Operationen und Prozeduren möglich. Für die Abbildung komplexer Eingriffe und Teilmaßnahmen
ist bei Operationen in verschiedenen Bereichen eine Zuordnung von mehreren Codes (ohne Duplikate) vorgesehen.
Dementsprechend sind gegebenenfalls Mehrfachkodierungen je Behandlungsfall nachgewiesen.
Quelle: Statistisches Bundesamt, DRG-Statistik.
© Statistisches Bundesamt (Destatis), Wiesbaden, 2025
Vervielfältigung und Verbreitung, auch auszugsweise, mit Quellenangabe gestattet.

[truncated: 10 more sheets: Auswahl 2014, Auswahl 2013, Auswahl 2012, Auswahl 2011, Auswahl 2010, Auswahl 2009, Auswahl 2008, Auswahl 2007, Auswahl 2006, Auswahl 2005]
